# Supplementary material for: Phloem-Mobile MYB44 Negatively Regulates Expression of PHOSPHATE TRANSPORTER 1 in Arabidopsis Roots
Source: MDPI journal article supplement (doi:10.3390/plants12203617), 2023-10-19
Supplement: s1 [file s1]

A

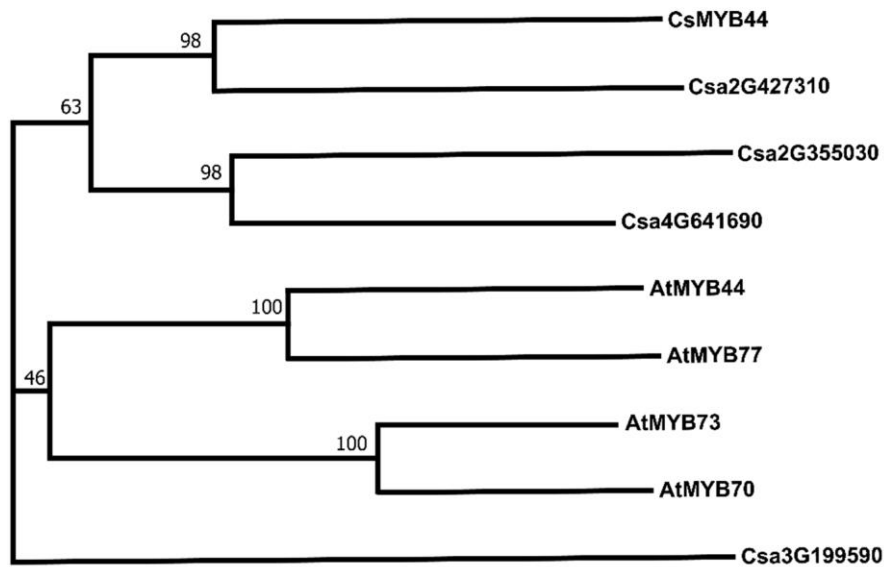

B

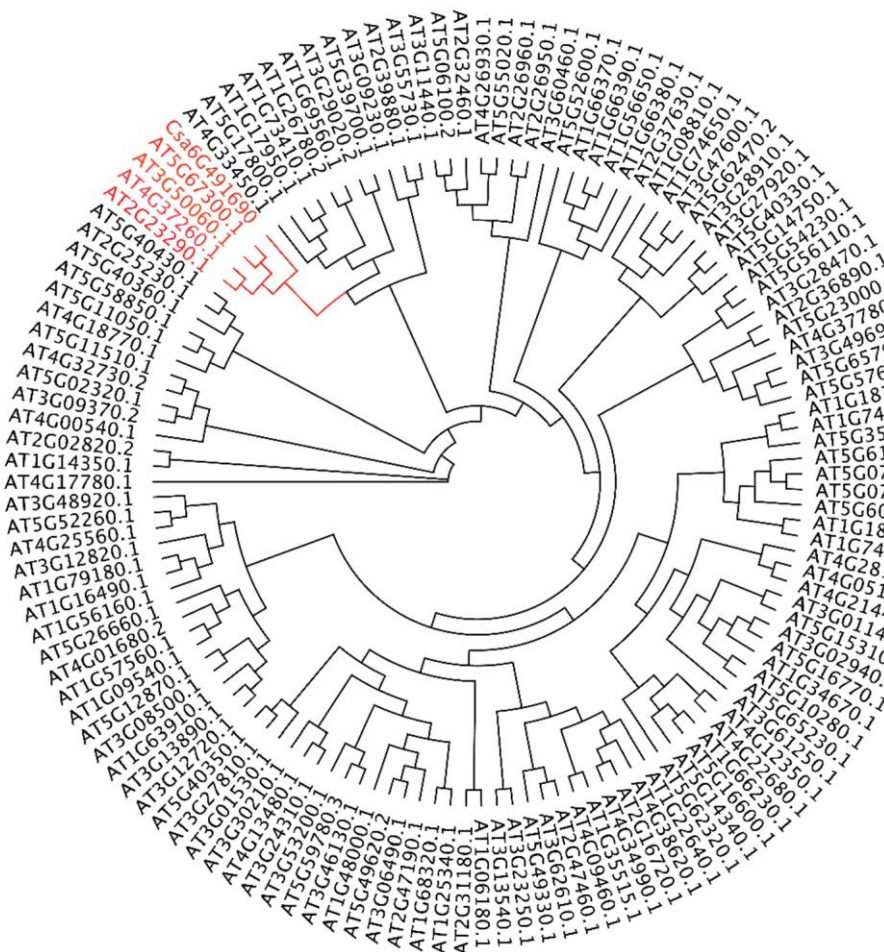

**Figure S1. Phylogenetic analysis of the *A. thaliana* MYB family.**

(A) The phylogenetic relationship of the MYB family in AtMYB44 and CsMYB44 clade. The numbers beside the nodes indicate bootstrap support values.

(B) The phylogenetic tree showed the relationship between the Arabidopsis MYB family and the cucumber MYB44, identified as potential phloem mobile mRNA in the previous study [29]. The clade of the MYB family, which showed the closest similarity with the cucumber MYB44, is highlighted in red.

Protein sequences of the Arabidopsis and cucumber MYB family, downloaded from The Arabidopsis Information Resource (TAIR) database and Cucurbit Genome database (CuGenDB), were aligned by using Clustal Omega (<https://www.ebi.ac.uk/Tools/msa/clustalo/>). The phylogenetic tree was generated with the neighbor-joining (NJ) method in Geneious software and MEGA11.

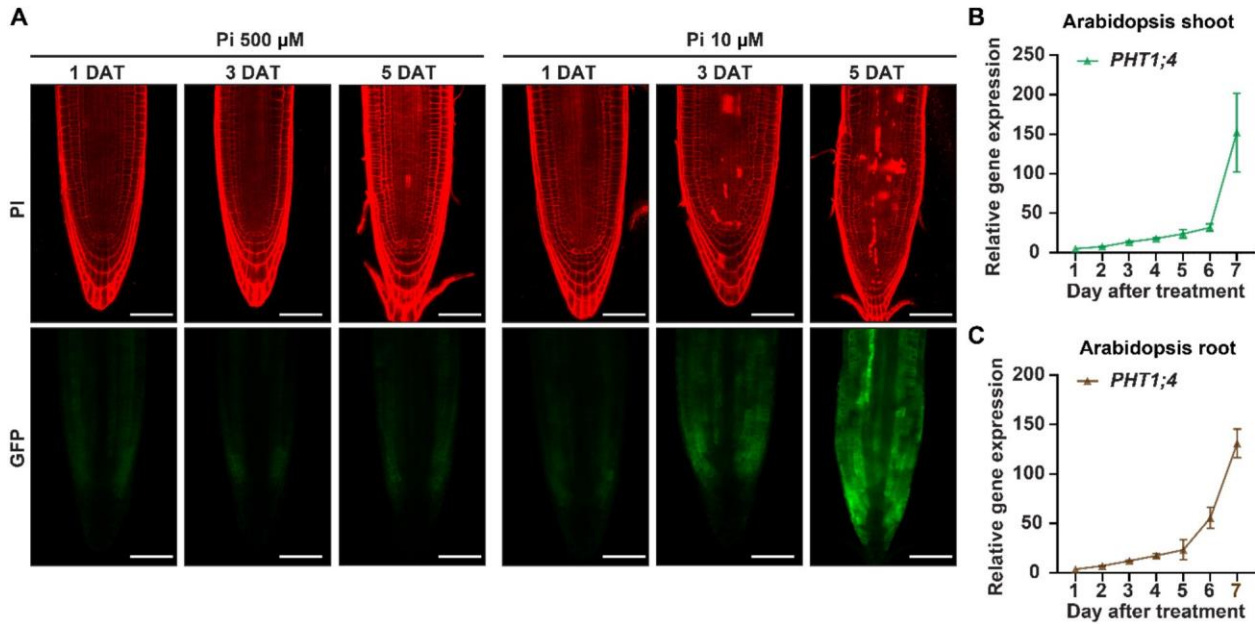

**Figure S2. *AtMYB44* expression was increased in response to Pi-starvation stress.**

(A) *AtMYB44-GFP* expression was increased in the primary root tip under Pi-starvation (10  $\mu$ M) conditions. Representative confocal images showed the GFP signal in the primary root tip after Pi-sufficient (500  $\mu$ M) (K) and starvation treatment (10  $\mu$ M) (L) for 1, 3 and 5 days. Arabidopsis seedling roots were stained with propidium iodide (PI, red). Epi, epidermis; Cor, cortex layer; End, endodermis. Bar = 50  $\mu$ m.

(B) and (C) The expression level of *PHT1;4* in shoots (B) and roots (C) under Pi-starvation conditions. Arabidopsis seedlings (Col-0), germinated on agar medium with 500  $\mu$ M Pi (Pi-sufficient medium) for 5 days, were transplanted to medium with 500  $\mu$ M, or 10  $\mu$ M Pi, and then collected over a 7-day time course of Pi-starvation treatment. The qRT-PCR analysis was performed with the same materials used in Figure 2M-N, to confirm that Pi-starvation treatment enhanced *PHT1;4* in shoots and roots of Arabidopsis seedlings. The Arabidopsis *Actin* gene was used as an internal control to normalize the qRT-PCR results. The data are presented as the mean  $\pm$  SD (three biological replicates and three technical repeats).

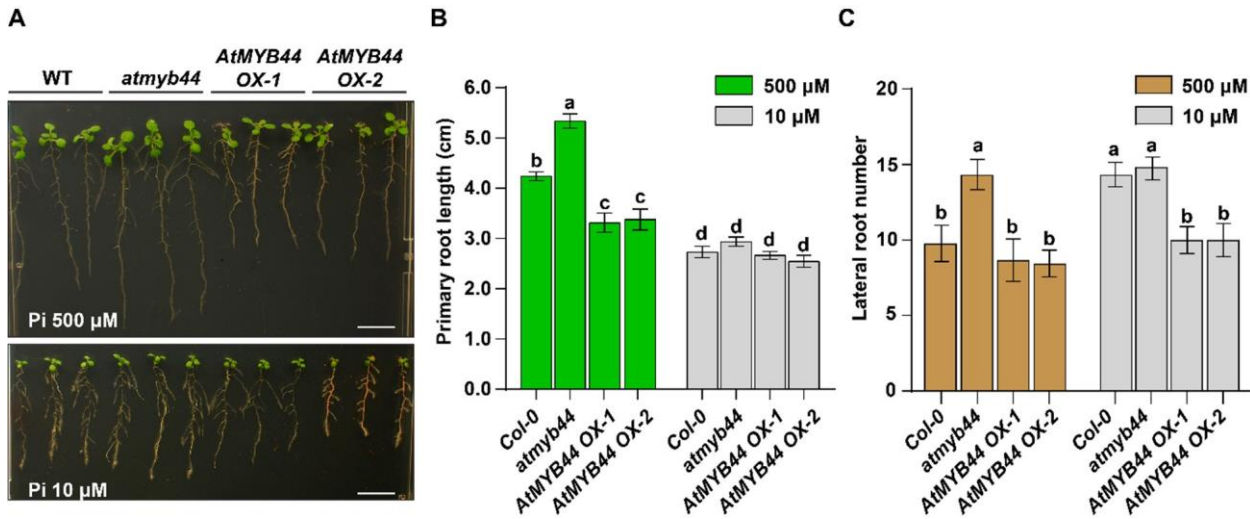

**Figure S3. AtMYB44 is involved in primary and lateral root development.**

(A) *atmyb44* displays enhanced primary root growth under Pi-sufficient (500  $\mu$ M) conditions compared to WT and OX lines. WT, *atmyb44*, *AtMYB44* OX-1 and *AtMYB44* OX-2 were grown on Pi-sufficient (500  $\mu$ M) and Pi-starvation (10  $\mu$ M) media for 11 days after germination. Bar = 1 cm.

(B) Primary root length of WT, *atmyb44*, *AtMYB44* OX-1 and *AtMYB44* OX-2 seedlings, grown on the agar media with 500  $\mu$ M, or 10  $\mu$ M Pi, was measured 11-day after germination (DAG) (n = 12).

(C) *atmyb44* shows enhanced lateral root formation under Pi-sufficient (500  $\mu$ M) conditions.

The different lowercase letters indicate significant differences in primary root length (B) and lateral root number (C), determined by the Tukey's test (p<0.05).

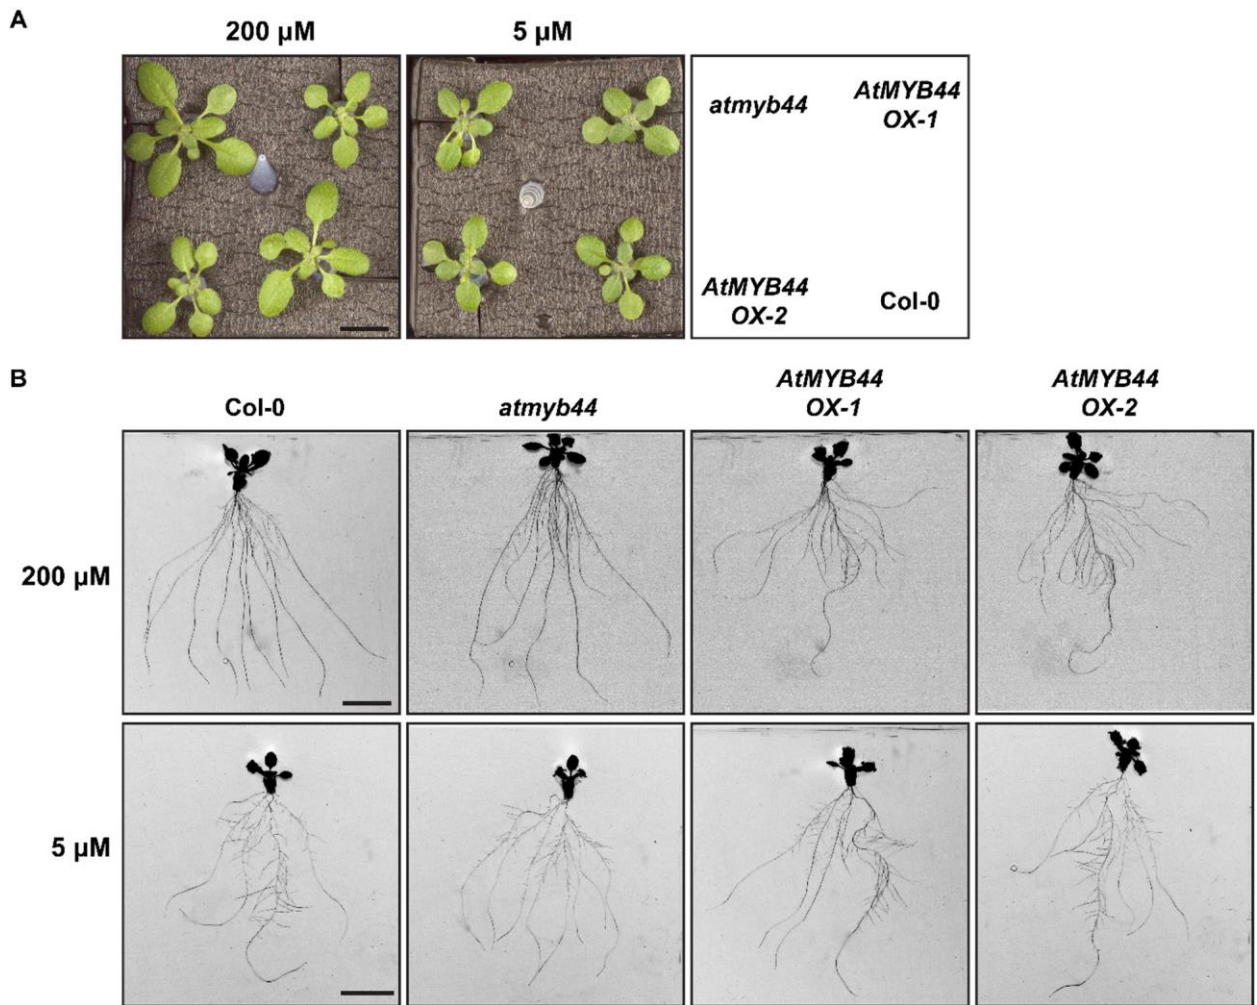

**Figure S4. AtMYB44 serves as a potential negative regulator in shoot and root development.**  
 Representative shoot (A) and root (B) images of WT, *atmyb44*, *AtMYB44* OX-1 and *AtMYB44* OX-2 plants grown in a hydroponic culture system with Pi-sufficient (200  $\mu$ M, left panel in Figure S3A, upper panel in Figure S3B) and -starvation (5  $\mu$ M, middle panel in Figure S3A, lower panel in Figure S3B) treatment. The right panel of Figure S3A indicates the position of WT, *atmyb44*, *AtMYB44* OX-1 and *AtMYB44* OX-2 plants in the hydroponic culture system. Bar = 1 cm.

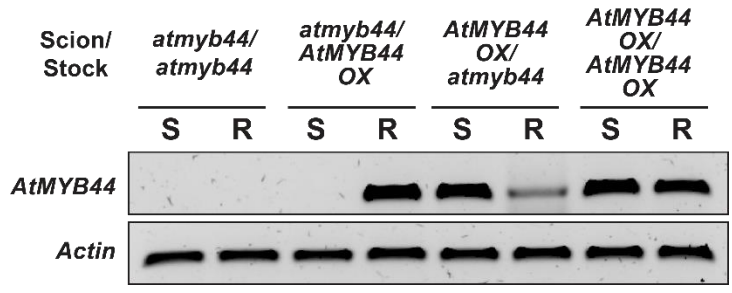

**Figure S5. Mobility of AtMYB44 mRNA.**  
*AtMYB44* is graft-transmissible from the *AtMYB44* OX-1 scion into the *atmyb44* rootstock.

**Table S1.** List of PCR primers used in this study

| Primer Name     | Oligonucleotide Sequence 5-3' | Target Gene Name |
|-----------------|-------------------------------|------------------|
| 055F_AtACT2     | GAAATCACAGCACTTGCAC           | AtActin2         |
| 055R_AtACT2     | AGCCTTTGATCTTGAGAG            | AtActin2         |
| F_AtMYB44       | TCTCCACCTGTTGTTACTGGGCTT      | AtMYB44          |
| R_AtMYB44       | TTGACTCGTGGCTACGGTTTGACT      | AtMYB44          |
| 060F_AtMYB70    | GGCGACGATTGCACGGCTTC          | AtMYB70          |
| 060R_AtMYB70    | CCATCATACCTCCATTACCACCG       | AtMYB70          |
| 061F_AtMYB73    | GCAGCGTCGAAGGGCAAAGT          | AtMYB73          |
| 061R_AtMYB73    | CCGATGGACTTCCGGGACTCA         | AtMYB73          |
| 048F_AtMYB77    | TGTCTTCGTCTTCGGAGGAT          | AtMYB77          |
| 048R_AtMYB77    | CCGCCATGTAACTCCTCACT          | AtMYB77          |
| 086F_AtPHT1;4   | TGACGTGGCCAAGACGCAAT          | AtPHT1;4         |
| 086R_AtPHT1;4   | GGCTTTTGTGCGCCTTCCAC          | AtPHT1;4         |
| 088F_proAtMYB44 | CACCAAGATGAAATAGTACTTG        | AtMYB44 promoter |
| 088R_proAtMYB44 | TGATTTTGAATGTTTTATCAAA        | AtMYB44 promoter |
| Pht1-2-F        | GCAACGAAGCCAAGGGTGTC          | AtPHT1;2         |
| Pht1-2-R        | GAAAGCCCCACGGGTCTTCT          | AtPHT1;2         |
| MGD3-F          | CCATCTTCCCTCGCACTATTCT        | AtMGD3           |
| MGD3-R          | ATCTCCAAGGGCTAGAGCTGTTT       | AtMGD3           |
