# Supplementary material for: Phloem-Mobile MYB44 Negatively Regulates Expression of PHOSPHATE TRANSPORTER 1 in Arabidopsis Roots
Source: Plants (Basel). 2023 Oct 19;12(20):3617. doi: 10.3390/plants12203617 (PMC10610484; doi:10.3390/plants12203617)
Supplement: Supplementary file 1 [file plants-12-03617-s001.zip › Table S2 (Olukayode et al- Plants).xlsx]

## Sheet: Table S2
Table S2. Potential AtMYB44-mediated gene regulation in Arabidopsis. AtMYB44 target bindings were analyzed using the ConnecTF (https://connectf.org) tool.
Full Name	Gene Family	Edge Count	Gene ID	AT5G67300
				Analysis: MACS2_P<1e-16	Analysis: GEM_Q<0.01
				Edges: in planta:Bound 11715	Edges: in vitro:Bound:DAP 10286
				EDGE	EDGE
LATE ELONGATED HYPOCOTYL		3	AT1G01060	+	+
3-ketoacyl-CoA synthase 1	Acyl Lipid Metabolism Family	3	AT1G01120	+	+
		3	AT1G01180	+	+
		3	AT1G01300	+	+
cyclic nucleotide gated channel 10	CNGCs,Ion Channel Families	3	AT1G01340	+	+
1-amino-cyclopropane-1-carboxylate synthase 2		3	AT1G01480	+	+
MAP kinase 11	MAP Kinase (MAPK) Family	3	AT1G01560	+	+
	NAC Transcription Factor Family	3	AT1G01720	+	+
	Acyl Lipid Metabolism Family	3	AT1G02660	+	+
	Rad5/16-like gene family	3	AT1G02670	+	+
		3	AT1G03220	+	+
casein kinase like 13		3	AT1G04440	+	+
		3	AT1G04500	+	+
	Polysaccharide Lyase Gene Families	3	AT1G04680	+	+
	Protein tyrosine phosphatase (PTP) family	3	AT1G05000	+	+
mitogen-activated protein kinase kinase kinase 18	MAP Kinase Kinase Kinase (MAPKKK) Family	3	AT1G05100	+	+
POM-POM1	Glycoside Hydrolase Gene Families	3	AT1G05850	+	+
alternative NAD(P)H dehydrogenase 1		3	AT1G07180	+	+
		3	AT1G07220	+	+
		3	AT1G07473	+	+
		3	AT1G07570	+	+
		3	AT1G07620	+	+
pol-like 5	PP2C-type phosphatases	3	AT1G07630	+	+
		3	AT1G08050	+	+
	basic Helix-Loop-Helix (bHLH) Transcription Factor,bHLH Transcription Factor Family	3	AT1G09250	+	+
		3	AT1G10650	+	+
ATP-citrate lyase A-1	Acyl Lipid Metabolism Family	3	AT1G10670	+	+
phosphoribosyl pyrophosphate (PRPP) synthase 3		3	AT1G10700	+	+
	Receptor kinase-like protein family	3	AT1G11050	+	+
		3	AT1G11210	+	+
sugar transporter 1	Monosaccharide transporter-like gene family,Organic Solute Cotransporters	3	AT1G11260	+	+
		3	AT1G11380	+	+
		3	AT1G11740	+	+
		3	AT1G11960	+	+
eukaryotic initiation factor 4B2	Eukaryotic Initiation Factor Gene Family	3	AT1G13020	+	+
HYPERSENSITIVITY TO LOW PI-ELICITED PRIMARY ROOT SHORTENING 1	G2-like Transcription Factor Family	3	AT1G13300	+	+
		3	AT1G13360	+	+
ATPase E1		3	AT1G13690	+	+
		3	AT1G14020	+	+
		3	AT1G14330	+	+
protein kinase 2A		3	AT1G14370	+	+
peroxidase 4	Class III peroxidase	3	AT1G14540	+	+
	Receptor kinase-like protein family	3	AT1G15530	+	+
	Primary Pumps (ATPases) Gene Families	3	AT1G15690	+	+
		3	AT1G15800	+	+
magnesium transporter 2	Magnesium Transporter Gene Family	3	AT1G16010	+	+
wall associated kinase-like 6	Receptor kinase-like protein family	3	AT1G16110	+	+
wall associated kinase-like 2	Receptor kinase-like protein family	3	AT1G16130	+	+
wall associated kinase-like 4	Receptor kinase-like protein family	3	AT1G16150	+	+
organic cation/carnitine transporter 6	Organic Solute Cotransporters	3	AT1G16370	+	+
		3	AT1G16650	+	+
		3	AT1G17147	+	+
	Acyl Lipid Metabolism Family	3	AT1G17340	+	+
lipoxygenase 3	Acyl Lipid Metabolism Family	3	AT1G17420	+	+
homology to ABI2	PP2C-type phosphatases	3	AT1G17550	+	+
		3	AT1G17620	+	+
RAB GTPase homolog A6B		3	AT1G18200	+	+
	C3H Transcription Factor Family	3	AT1G19310	+	+
		3	AT1G19650	+	+
ESCAROLA		3	AT1G20900	+	+
		3	AT1G21010	+	+
		3	AT1G21410	+	+
		3	AT1G21590	+	+
	Organic Solute Cotransporters,Sucrose-H+ symporters	3	AT1G22710	+	+
PIN-FORMED 7	Organic Solute Cotransporters	3	AT1G23080	+	+
cellulose synthase-like A3	Glycosyltransferase Gene Families,Miscellaneous Membrane Protein Families	3	AT1G23480	+	+
ADP-ribosylation factor 1		3	AT1G23490	+	+
		3	AT1G23710	+	+
	Receptor kinase-like protein family	3	AT1G25390	+	+
		3	AT1G25400	+	+
		3	AT1G27100	+	+
		3	AT1G27420	+	+
		3	AT1G28190	+	+
receptor like protein 4		3	AT1G28340	+	+
		3	AT1G28390	+	+
WRKY DNA-binding protein 65	WRKY Transcription Factor Family,WRKY Transcription Factor Superfamily	3	AT1G29280	+	+
nudix hydrolase homolog 25		3	AT1G30110	+	+
		3	AT1G30320	+	+
DAD1-like acylhydrolase	Acyl Lipid Metabolism Family	3	AT1G30370	+	+
KAR-UP F-box 1		3	AT1G31350	+	+
extra-large GTP-binding protein 3		3	AT1G31930	+	+
pinoresinol reductase 1		3	AT1G32100	+	+
		3	AT1G32460	+	+
		3	AT1G33970	+	+
	PP2C-type phosphatases	3	AT1G34750	+	+
		3	AT1G35780	+	+
SKU5-similar 6		3	AT1G41830	+	+
amino acid permease 5	AAAP family,Organic Solute Cotransporters	3	AT1G44100	+	+
IAA-leucine resistant (ILR)-like gene 6		3	AT1G44350	+	+
Siliques Are Red 1	Nodulin-like protein family	3	AT1G44800	+	+
gibberellin 2-oxidase 4		3	AT1G47990	+	+
	AGC Family	3	AT1G48490	+	+
		3	AT1G49000	+	+
		3	AT1G49450	+	+
S-methyl-5-thioribose kinase		3	AT1G49820	+	+
		3	AT1G49980	+	+
DOF zinc finger protein 1	C2C2-Dof Transcription Factor Family,Dof family	3	AT1G51700	+	+
		3	AT1G52200	+	+
PDI-like 1-5		3	AT1G52260	+	+
LATE EMBRYOGENESIS ABUNDANT 7		3	AT1G52690	+	+
phosphoenolpyruvate carboxylase 1		3	AT1G53310	+	+
	Receptor kinase-like protein family	3	AT1G53430	+	+
		3	AT1G53560	+	+
		3	AT1G53620	+	+
pectin methylesterase 2	Carbohydrate Esterase Gene Families	3	AT1G53830	+	+
aldehyde dehydrogenase 7B4	Acyl Lipid Metabolism Family,Aldehyde Dehydrogenase Superfamily	3	AT1G54100	+	+
		3	AT1G55450	+	+
		3	AT1G56140	+	+
phloem protein 2-B14		3	AT1G56250	+	+
receptor like protein 9		3	AT1G58190	+	+
amino acid permease 1	AAAP family,Organic Solute Cotransporters	3	AT1G58360	+	+
		3	AT1G59620	+	+
		3	AT1G59650	+	+
PENETRATION 3	ABC Superfamily,ABC transporters,ABC transporters (Smart Lab)	3	AT1G59870	+	+
	FH2 proteins	3	AT1G59910	+	+
		3	AT1G61240	+	+
		3	AT1G61260	+	+
S-domain-1 29		3	AT1G61380	+	+
UDP-D-glucose/UDP-D-galactose 4-epimerase 3		3	AT1G63180	+	+
		3	AT1G63720	+	+
respiratory burst oxidase protein F	EF-hand containing proteins,Miscellaneous Membrane Protein Families	3	AT1G64060	+	+
NONEXPRESSER OF PR GENES 1		3	AT1G64280	+	+
		3	AT1G64330	+	+
glycosyl hydrolase 9C2	Glycoside Hydrolase Gene Families	3	AT1G64390	+	+
long-chain acyl-CoA synthetase 3	Acyl Lipid Metabolism Family	3	AT1G64400	+	+
YELLOW STRIPE like 7		3	AT1G65730	+	+
MALE MEIOCYTE DEATH 1		3	AT1G66170	+	+
calmodulin like 23	EF-hand containing proteins	3	AT1G66400	+	+
		3	AT1G66480	+	+
		3	AT1G67050	+	+
DARK INDUCIBLE 9		3	AT1G67070	+	+
	Receptor kinase-like protein family	3	AT1G67510	+	+
	Plant U-box protein (PUB)	3	AT1G67530	+	+
		3	AT1G67920	+	+
PIGMENT DEFECTIVE 337		3	AT1G68450	+	+
related to ABI3/VP1 2	RAV Transcription Factor Family	3	AT1G68840	+	+
expansin A1	Expansins	3	AT1G69530	+	+
		3	AT1G69760	+	+
WRKY DNA-binding protein 36	WRKY Transcription Factor Family,WRKY Transcription Factor Superfamily	3	AT1G69810	+	+
		3	AT1G69840	+	+
matrix metalloproteinase		3	AT1G70170	+	+
		3	AT1G70250	+	+
K+ uptake permease 6	Inorganic Solute Cotransporters	3	AT1G70300	+	+
polygalacturonase 2		3	AT1G70370	+	+
		3	AT1G70420	+	+
cysteine-rich RLK (RECEPTOR-like protein kinase) 2	Receptor kinase-like protein family	3	AT1G70520	+	+
cysteine-rich RLK (RECEPTOR-like protein kinase) 3	Receptor kinase-like protein family	3	AT1G70530	+	+
		3	AT1G70640	+	+
choline kinase 1	Acyl Lipid Metabolism Family	3	AT1G71697	+	+
		3	AT1G71870	+	+
		3	AT1G72240	+	+
casein kinase 1-like protein 2		3	AT1G72710	+	+
PEP1 receptor 1	Receptor kinase-like protein family	3	AT1G73080	+	+
		3	AT1G73090	+	+
GDP-4-keto-6-deoxymannose-3,5-epimerase-4-reductase 1		3	AT1G73250	+	+
MAP kinase kinase 9	MAP Kinase Kinase (MAPKK) Family	3	AT1G73500	+	+
nudix hydrolase homolog 21		3	AT1G73540	+	+
SAR Deficient 1		3	AT1G73805	+	+
	C3H Transcription Factor Family,Miscellaneous Membrane Protein Families	3	AT1G74370	+	+
	AP2-EREBP Transcription Factor Family	3	AT1G74930	+	+
BRASSINAZOLE-RESISTANT 1	BZR Transcription Factor Family	3	AT1G75080	+	+
SKU5 similar 5		3	AT1G76160	+	+
		3	AT1G76240	+	+
indole glucosinolate O-methyltransferase 5	Monolignol Biosynthesis	3	AT1G76790	+	+
		3	AT1G76970	+	+
ACT domain repeat 3		3	AT1G76990	+	+
alcohol dehydrogenase 1		3	AT1G77120	+	+
		3	AT1G77330	+	+
lysin-motif (LysM) domain protein 3		3	AT1G77630	+	+
	AP2-EREBP Transcription Factor Family	3	AT1G77640	+	+
		3	AT1G78040	+	+
		3	AT1G78830	+	+
camelliol C synthase 1		3	AT1G78955	+	+
		3	AT1G79160	+	+
metacaspase 4		3	AT1G79340	+	+
phloem protein 2-B11		3	AT1G80110	+	+
	Miscellaneous Membrane Protein Families	3	AT1G80280	+	+
		3	AT1G80380	+	+
nonhost resistance to P. s. phaseolicola 1		3	AT1G80460	+	+
		3	AT1G80520	+	+
	Nodulin-like protein family	3	AT1G80530	+	+
WRKY DNA-binding protein 66	WRKY Transcription Factor Family,WRKY Transcription Factor Superfamily	3	AT1G80590	+	+
cinnamoyl coa reductase	Monolignol Biosynthesis	3	AT1G80820	+	+
WRKY DNA-binding protein 40	WRKY Transcription Factor Family,WRKY Transcription Factor Superfamily	3	AT1G80840	+	+
bidirectional amino acid transporter 1	Organic Solute Cotransporters	3	AT2G01170	+	+
		3	AT2G02170	+	+
		3	AT2G03240	+	+
		3	AT2G03250	+	+
purple acid phosphatase 9	Miscellaneous Membrane Protein Families	3	AT2G03450	+	+
ACT domain repeat 5		3	AT2G03730	+	+
phosphoinositide 4-kinase gamma 7	Acyl Lipid Metabolism Family	3	AT2G03890	+	+
		3	AT2G12400	+	+
		3	AT2G15630	+	+
cold regulated 413 plasma membrane 1		3	AT2G15970	+	+
actin depolymerizing factor 5		3	AT2G16700	+	+
		3	AT2G16900	+	+
		3	AT2G17033	+	+
		3	AT2G17760	+	+
cytidine deaminase 1		3	AT2G19570	+	+
		3	AT2G19880	+	+
		3	AT2G19930	+	+
		3	AT2G20562	+	+
		3	AT2G22510	+	+
embryo defective 2001		3	AT2G22870	+	+
		3	AT2G23270	+	+
myb domain protein 70	MYB,MYB Transcription Factor Family	3	AT2G23290	+	+
LysM-containing receptor-like kinase 4	Receptor kinase-like protein family	3	AT2G23770	+	+
		3	AT2G23910	+	+
		3	AT2G24130	+	+
		3	AT2G24240	+	+
WRKY DNA-binding protein 17	WRKY Transcription Factor Family,WRKY Transcription Factor Superfamily	3	AT2G24570	+	+
	PP2C-type phosphatases	3	AT2G25070	+	+
cytochrome P450, family 711, subfamily A, polypeptide 1	Cytochrome P450	3	AT2G26170	+	+
		3	AT2G27310	+	+
		3	AT2G27900	+	+
LONELY GUY 1		3	AT2G28305	+	+
LOB domain-containing protein 11	AS2 family,Lateral Organ Boundaries Gene Family	3	AT2G28500	+	+
PLANT U-BOX 12	Plant U-box protein (PUB)	3	AT2G28830	+	+
XB3 ortholog 1 in Arabidopsis thaliana		3	AT2G28840	+	+
protein kinase 1B		3	AT2G28930	+	+
		3	AT2G28940	+	+
		3	AT2G29670	+	+
		3	AT2G29720	+	+
	PP2C-type phosphatases	3	AT2G30020	+	+
mitogen-activated protein kinase kinase kinase 14	MAP Kinase Kinase Kinase (MAPKKK) Family	3	AT2G30040	+	+
		3	AT2G30990	+	+
		3	AT2G31810	+	+
		3	AT2G32150	+	+
receptor like protein 22	Receptor kinase-like protein family	3	AT2G32660	+	+
zinc finger nuclease 2	C2H2 Transcription Factor Family	3	AT2G32930	+	+
		3	AT2G33390	+	+
galactan synthase 1		3	AT2G33570	+	+
		3	AT2G33830	+	+
PINOID	AGC Family	3	AT2G34650	+	+
		3	AT2G35345	+	+
plant glycogenin-like starch initiation protein 7	Glycosyltransferase Gene Families,Miscellaneous Membrane Protein Families	3	AT2G35710	+	+
serine carboxypeptidase-like 28		3	AT2G35770	+	+
	C3H Transcription Factor Family	3	AT2G35910	+	+
		3	AT2G35920	+	+
plant U-box 23	Plant U-box protein (PUB)	3	AT2G35930	+	+
LONELY GUY 2		3	AT2G35990	+	+
uridine-ribohydrolase 1		3	AT2G36310	+	+
ATP-binding cassette G34	ABC Superfamily,ABC transporters,ABC transporters (Smart Lab)	3	AT2G36380	+	+
		3	AT2G36410	+	+
TON1 Recruiting Motif 27		3	AT2G36420	+	+
fructose-bisphosphate aldolase 6		3	AT2G36460	+	+
	Class III peroxidase	3	AT2G37130	+	+
		3	AT2G37750	+	+
		3	AT2G37820	+	+
AUXIN RESISTANT 1	AAAP family,Organic Solute Cotransporters	3	AT2G38120	+	+
ammonium transporter 2	Inorganic Solute Cotransporters	3	AT2G38290	+	+
PYR1-like 4		3	AT2G38310	+	+
WRKY DNA-binding protein 33	WRKY Transcription Factor Family,WRKY Transcription Factor Superfamily	3	AT2G38470	+	+
annexin 4		3	AT2G38750	+	+
phosphate transporter 1;4	Inorganic Solute Cotransporters	3	AT2G38940	+	+
MILDEW RESISTANCE LOCUS O 12	Miscellaneous Membrane Protein Families,MLO proteins	3	AT2G39200	+	+
ATP-binding cassette G1	ABC Superfamily,ABC transporters	3	AT2G39350	+	+
	Receptor kinase-like protein family	3	AT2G39360	+	+
	Acyl Lipid Metabolism Family	3	AT2G39400	+	+
ACT domain repeats 9		3	AT2G39570	+	+
		3	AT2G39650	+	+
CYTOKINESIS DEFECTIVE 1		3	AT2G39770	+	+
		3	AT2G39980	+	+
ortholog of sugar beet HS1 PRO-1 2		3	AT2G40000	+	+
		3	AT2G40095	+	+
		3	AT2G40110	+	+
		3	AT2G40280	+	+
expansin A8	Expansins	3	AT2G40610	+	+
		3	AT2G40820	+	+
calmodulin 2	EF-hand containing proteins	3	AT2G41110	+	+
response regulator 3	Response Regulator	3	AT2G41310	+	+
		3	AT2G41640	+	+
guanylate kinase 1		3	AT2G41880	+	+
OXIDATIVE STRESS 2		3	AT2G41900	+	+
		3	AT2G42060	+	+
lateral organ boundaries-domain 16	AS2 family,Lateral Organ Boundaries Gene Family	3	AT2G42430	+	+
MAP kinase 20	MAP Kinase (MAPK) Family	3	AT2G42880	+	+
MEI2-like 2		3	AT2G42890	+	+
NAC domain containing protein 42	NAC Transcription Factor Family	3	AT2G43000	+	+
		3	AT2G43340	+	+
		3	AT2G44430	+	+
PENETRATION 2	Glycoside Hydrolase Gene Families	3	AT2G44490	+	+
		3	AT2G44578	+	+
		3	AT2G44600	+	+
LOB domain-containing protein 18	AS2 family,Lateral Organ Boundaries Gene Family	3	AT2G45420	+	+
LITTLE ZIPPER 1		3	AT2G45450	+	+
		3	AT2G45670	+	+
TCP domain protein 9	TCP transcription factor family ï¿½	3	AT2G45680	+	+
		3	AT2G45870	+	+
plasma membrane intrinsic protein 1B	Aquaporin Families,MIP family	3	AT2G45960	+	+
		3	AT2G46140	+	+
		3	AT2G46170	+	+
light-response BTB 1		3	AT2G46260	+	+
cyclic nucleotide gated channel 3	CNGCs,Ion Channel Families	3	AT2G46430	+	+
auxin response factor 11	ARF Transcription Factor Family	3	AT2G46530	+	+
		3	AT2G46550	+	+
	EF-hand containing proteins	3	AT2G46600	+	+
		3	AT2G46690	+	+
		3	AT2G46915	+	+
		3	AT2G46940	+	+
short-chain dehydrogenase/reductase 2		3	AT2G47130	+	+
NAD+ transporter 1	Chloroplast and Mitochondria gene families	3	AT2G47490	+	+
hypersensitive induced reaction 2		3	AT3G01290	+	+
TWO OR MORE ABRES-CONTAINING GENE 2		3	AT3G02140	+	+
S-adenosylmethionine decarboxylase		3	AT3G02470	+	+
	14-3-3 proteins,14-3-3s	3	AT3G02520	+	+
RADIATION SENSITIVE23C		3	AT3G02540	+	+
		3	AT3G02840	+	+
STELAR K+ outward rectifier	Ion Channel Families	3	AT3G02850	+	+
IAA-LEUCINE RESISTANT 1		3	AT3G02875	+	+
	EF-hand containing proteins	3	AT3G03000	+	+
WRKY DNA-binding protein 39	WRKY Transcription Factor Family,WRKY Transcription Factor Superfamily	3	AT3G04670	+	+
Arabidopsis toxicos en levadura 6	RRE (Rapid Response to Elicitors)	3	AT3G05200	+	+
		3	AT3G05210	+	+
		3	AT3G05840	+	+
		3	AT3G05990	+	+
		3	AT3G06130	+	+
		3	AT3G06410	+	+
autophagy 8h		3	AT3G06420	+	+
myb domain protein 108	MYB,MYB Transcription Factor Family	3	AT3G06490	+	+
		3	AT3G07570	+	+
		3	AT3G08620	+	+
		3	AT3G08760	+	+
	Protein tyrosine phosphatase (PTP) family	3	AT3G09100	+	+
calmodulin-domain protein kinase cdpk isoform 2	Calcium Dependent Protein Kinase,CDPKs	3	AT3G10660	+	+
AZA-guanine resistant1		3	AT3G10960	+	+
DRE/CRT-binding protein 2B	AP2-EREBP Transcription Factor Family	3	AT3G11020	+	+
protein phosphatase 2CA	PP2C-type phosphatases	3	AT3G11410	+	+
		3	AT3G11600	+	+
FASCICLIN-like arabinogalactan protein 18 precursor		3	AT3G11700	+	+
BOI-related gene 3		3	AT3G12920	+	+
		3	AT3G13000	+	+
OVULE ABORTION 5		3	AT3G13490	+	+
	Glycoside Hydrolase Gene Families	3	AT3G13790	+	+
GDSL-motif lipase 4		3	AT3G14225	+	+
FORMS APLOID AND BINUCLEATE CELLS 1B	Acyl Lipid Metabolism Family,EF-hand containing proteins	3	AT3G14270	+	+
		3	AT3G15090	+	+
ethylene responsive element binding factor 4	AP2-EREBP Transcription Factor Family	3	AT3G15210	+	+
		3	AT3G15530	+	+
indole-3-acetic acid inducible 19		3	AT3G15540	+	+
delta tonoplast integral protein	Aquaporin Families,MIP family	3	AT3G16240	+	+
	AP2-EREBP Transcription Factor Family	3	AT3G16280	+	+
		3	AT3G16350	+	+
	Miscellaneous Membrane Protein Families	3	AT3G16690	+	+
TOPLESS-related 2		3	AT3G16830	+	+
acyl-activating enzyme 7	Miscellaneous Membrane Protein Families	3	AT3G16910	+	+
	CAMTA Transcription Factor Family,EICBPs	3	AT3G16940	+	+
		3	AT3G17450	+	+
cyclic nucleotide-binding transporter 1	CNGCs,Ion Channel Families	3	AT3G17700	+	+
peroxin 3-1		3	AT3G18160	+	+
		3	AT3G18560	+	+
plant U-box 29	Plant U-box protein (PUB)	3	AT3G18710	+	+
	C3H Transcription Factor Family	3	AT3G18930	+	+
		3	AT3G18950	+	+
		3	AT3G19680	+	+
sugar transporter 4	Monosaccharide transporter-like gene family,Organic Solute Cotransporters	3	AT3G19930	+	+
ethylene response factor 7	AP2-EREBP Transcription Factor Family	3	AT3G20310	+	+
non race-specific disease resistance 1		3	AT3G20600	+	+
		3	AT3G20898	+	+
NAD kinase 1		3	AT3G21070	+	+
4-coumarate:CoA ligase 2	Monolignol Biosynthesis	3	AT3G21240	+	+
		3	AT3G21690	+	+
		3	AT3G21710	+	+
EARLY LIGHT-INDUCABLE PROTEIN		3	AT3G22840	+	+
	ACA,Primary Pumps (ATPases) Gene Families	3	AT3G22910	+	+
		3	AT3G23090	+	+
		3	AT3G23300	+	+
REF4-related 1		3	AT3G23590	+	+
		3	AT3G23600	+	+
		3	AT3G24420	+	+
		3	AT3G24840	+	+
RPM1 interacting protein 4		3	AT3G25070	+	+
	EF-hand containing proteins	3	AT3G25600	+	+
basic helix-loop-helix 32	basic Helix-Loop-Helix (bHLH) Transcription Factor,bHLH Transcription Factor Family	3	AT3G25710	+	+
ethylene response DNA binding factor 3	RAV Transcription Factor Family	3	AT3G25730	+	+
methionine aminopeptidase 1C		3	AT3G25740	+	+
NIM1-interacting 2		3	AT3G25882	+	+
		3	AT3G27210	+	+
		3	AT3G27330	+	+
short-chain dehydrogenase reductase 4		3	AT3G29250	+	+
UDP-glucose dehydrogenase 2		3	AT3G29360	+	+
EARLY RESPONSIVE TO DEHYDRATION 5		3	AT3G30775	+	+
		3	AT3G44190	+	+
		3	AT3G44850	+	+
	Organic Solute Cotransporters	3	AT3G45660	+	+
	C2H2 Transcription Factor Family	3	AT3G46080	+	+
		3	AT3G46280	+	+
PLANT U-BOX 39	Plant U-box protein (PUB)	3	AT3G47820	+	+
GLUCOSINOLATE TRANSPORTER-1	Organic Solute Cotransporters	3	AT3G47960	+	+
enhanced disease susceptibility 1		3	AT3G48090	+	+
		3	AT3G48450	+	+
branched-chain aminotransferase 3		3	AT3G49680	+	+
phytosulfokine 4 precursor		3	AT3G49780	+	+
		3	AT3G49790	+	+
mitogen-activated protein kinase kinase kinase 20	MAP Kinase Kinase Kinase (MAPKKK) Family	3	AT3G50310	+	+
	Cytochrome P450	3	AT3G50660	+	+
	PP2C-type phosphatases	3	AT3G51370	+	+
		3	AT3G51660	+	+
		3	AT3G51750	+	+
SAC domain-containing protein 8	Acyl Lipid Metabolism Family	3	AT3G51830	+	+
		3	AT3G51890	+	+
acyl-CoA sterol acyl transferase 1	Acyl Lipid Metabolism Family,Miscellaneous Membrane Protein Families	3	AT3G51970	+	+
sucrose-6F-phosphate phosphohydrolase 2		3	AT3G52340	+	+
		3	AT3G52360	+	+
syntaxin of plants 122	SNAREs	3	AT3G52400	+	+
plant U-box 22	Plant U-box protein (PUB)	3	AT3G52450	+	+
		3	AT3G52470	+	+
		3	AT3G52480	+	+
		3	AT3G52710	+	+
UDP-glucosyl transferase 73D1		3	AT3G53150	+	+
		3	AT3G53990	+	+
		3	AT3G54000	+	+
BLUE MICROPYLAR END 3	C2C2-Gata Transcription Factor Family	3	AT3G54810	+	+
	PP2C-type phosphatases	3	AT3G55050	+	+
proline transporter 2	Organic Solute Cotransporters	3	AT3G55740	+	+
		3	AT3G55840	+	+
CRINKLY4 related 3	Receptor kinase-like protein family	3	AT3G55950	+	+
cellulose synthase like A14	Glycosyltransferase Gene Families,Miscellaneous Membrane Protein Families	3	AT3G56000	+	+
		3	AT3G56360	+	+
		3	AT3G56420	+	+
		3	AT3G56760	+	+
		3	AT3G56930	+	+
		3	AT3G57420	+	+
		3	AT3G59300	+	+
		3	AT3G59660	+	+
IQ-domain 13	IQD Protein Family	3	AT3G59690	+	+
squamosa promoter-binding protein-like 12	SBP Transcription Factor Family,Superfamily of zinc-coordinating DNA-binding proteins	3	AT3G60030	+	+
beta glucosidase 27	Glycoside Hydrolase Gene Families	3	AT3G60120	+	+
		3	AT3G60450	+	+
		3	AT3G60670	+	+
brassinosteroid-responsive RING-H2		3	AT3G61460	+	+
		3	AT3G61560	+	+
homeobox 12	Homeobox Transcription Factor Family	3	AT3G61890	+	+
indole-3-acetic acid inducible 30		3	AT3G62100	+	+
ATP-binding cassette B21	ABC Superfamily,ABC transporters	3	AT3G62150	+	+
	Acyl Lipid Metabolism Family	3	AT3G62590	+	+
maternal effect embryo arrest 44		3	AT4G00060	+	+
		3	AT4G01670	+	+
	WRKY Transcription Factor Family,WRKY Transcription Factor Superfamily	3	AT4G01720	+	+
GLYCEROL-3-PHOSPHATE sn-2-ACYLTRANSFERASE 3	Acyl Lipid Metabolism Family	3	AT4G01950	+	+
	Receptor kinase-like protein family	3	AT4G02410	+	+
glutathione S-transferase PHI 2	Glutathione S-transferase Family	3	AT4G02520	+	+
	Miscellaneous Membrane Protein Families,MLO proteins	3	AT4G02600	+	+
		3	AT4G02760	+	+
RNA-binding protein-defense related 1		3	AT4G03110	+	+
		3	AT4G03480	+	+
RING membrane-anchor 1		3	AT4G03510	+	+
two-pore channel 1	EF-hand containing proteins,Ion Channel Families	3	AT4G03560	+	+
calcium-dependent protein kinase 27	Calcium Dependent Protein Kinase,CDPKs	3	AT4G04700	+	+
	Receptor kinase-like protein family	3	AT4G08850	+	+
EXORDIUM		3	AT4G08950	+	+
		3	AT4G09160	+	+
		3	AT4G10500	+	+
	MAP Kinase Kinase Kinase Kinase (MAPKKKK) Family	3	AT4G10730	+	+
1-aminocyclopropane-1-carboxylic acid (acc) synthase 6		3	AT4G11280	+	+
MAP kinase 5	MAP Kinase (MAPK) Family	3	AT4G11330	+	+
	Glycosyltransferase Gene Families	3	AT4G11350	+	+
RING-H2 finger A1A		3	AT4G11370	+	+
trehalose-6-phosphate phosphatase F		3	AT4G12430	+	+
		3	AT4G12840	+	+
NSP (nuclear shuttle protein)-interacting GTPase		3	AT4G13350	+	+
		3	AT4G14342	+	+
		3	AT4G14746	+	+
RNAse II-like 1		3	AT4G15417	+	+
		3	AT4G15630	+	+
inositol transporter 4	Monosaccharide transporter-like gene family,Organic Solute Cotransporters	3	AT4G16480	+	+
homeobox protein 2	Homeobox Transcription Factor Family	3	AT4G16780	+	+
ethylene responsive element binding factor 6	AP2-EREBP Transcription Factor Family	3	AT4G17490	+	+
	AP2-EREBP Transcription Factor Family	3	AT4G17500	+	+
calcineurin B-like protein 1	Calcineurin B-like Calcium Sensor Proteins (AtCBLs),EF-hand containing proteins	3	AT4G17615	+	+
INOSITOL(1,4,5)P3 5-PHOSPHATASE II		3	AT4G18010	+	+
Ca2+ activated outward rectifying K+ channel 6	Ion Channel Families	3	AT4G18160	+	+
WRKY DNA-binding protein 28	WRKY Transcription Factor Family,WRKY Transcription Factor Superfamily	3	AT4G18170	+	+
	Glycoside Hydrolase Gene Families	3	AT4G18340	+	+
BRASSINOSTEROID-INSENSITIVE 2		3	AT4G18710	+	+
BES1/BZR1 homolog 3	BZR Transcription Factor Family	3	AT4G18890	+	+
NOD26-like intrinsic protein 1;2	Aquaporin Families,MIP family	3	AT4G18910	+	+
GASSHO1		3	AT4G20140	+	+
		3	AT4G20320	+	+
		3	AT4G20830	+	+
amino acid transporter 1	Organic Solute Cotransporters	3	AT4G21120	+	+
		3	AT4G21390	+	+
cysteine-rich RLK (RECEPTOR-like protein kinase) 28	Receptor kinase-like protein family	3	AT4G21400	+	+
		3	AT4G21903	+	+
ACT domain repeat 7		3	AT4G22780	+	+
homolog of separase		3	AT4G22970	+	+
		3	AT4G22980	+	+
cysteine-rich RLK (RECEPTOR-like protein kinase) 11	Receptor kinase-like protein family	3	AT4G23190	+	+
	WRKY Transcription Factor Family,WRKY Transcription Factor Superfamily	3	AT4G23550	+	+
		3	AT4G24050	+	+
	C2C2-Dof Transcription Factor Family,Dof family	3	AT4G24060	+	+
		3	AT4G24130	+	+
TITAN-like		3	AT4G24900	+	+
		3	AT4G24970	+	+
		3	AT4G25030	+	+
		3	AT4G25170	+	+
TRICHOME BIREFRINGENCE-LIKE 18		3	AT4G25360	+	+
SEUSS-like 1		3	AT4G25520	+	+
beta-galactosidase 12	Glycoside Hydrolase Gene Families	3	AT4G26140	+	+
phosphofructokinase 3		3	AT4G26270	+	+
mitogen-activated protein kinase kinase kinase 16	MAP Kinase Kinase Kinase (MAPKKK) Family	3	AT4G26890	+	+
B-box domain protein 28	C2C2-CO-like Transcription Factor Family	3	AT4G27310	+	+
beta glucosidase 10	Glycoside Hydrolase Gene Families	3	AT4G27830	+	+
		3	AT4G27870	+	+
manganese tracking factor for mitochondrial SOD2		3	AT4G27940	+	+
		3	AT4G28460	+	+
		3	AT4G28840	+	+
		3	AT4G29690	+	+
		3	AT4G29780	+	+
MAP kinase kinase 2	MAP Kinase Kinase (MAPKK) Family	3	AT4G29810	+	+
H(+)-ATPase 2	Primary Pumps (ATPases) Gene Families	3	AT4G30190	+	+
		3	AT4G30350	+	+
gamma-glutamyl peptidase 1		3	AT4G30530	+	+
		3	AT4G30900	+	+
		3	AT4G31340	+	+
		3	AT4G31510	+	+
WRKY DNA-binding protein 11	WRKY Transcription Factor Family,WRKY Transcription Factor Superfamily	3	AT4G31550	+	+
	EF-hand containing proteins	3	AT4G32060	+	+
S-domain-2 5		3	AT4G32300	+	+
ascorbate peroxidase 6		3	AT4G32320	+	+
sulfoquinovosyldiacylglycerol 1	Acyl Lipid Metabolism Family	3	AT4G33030	+	+
	AGC Family	3	AT4G33080	+	+
		3	AT4G33160	+	+
arginine decarboxylase 2		3	AT4G34710	+	+
		3	AT4G35110	+	+
WUSCHEL related homeobox 13	Homeobox Transcription Factor Family,WOX gene family	3	AT4G35550	+	+
		3	AT4G36050	+	+
SMALL AUXIN UPREGULATED RNA 9		3	AT4G36110	+	+
		3	AT4G36150	+	+
		3	AT4G36500	+	+
irregular xylem 14	Glycosyltransferase Gene Families	3	AT4G36890	+	+
		3	AT4G36945	+	+
	Receptor kinase-like protein family	3	AT4G37250	+	+
myb domain protein 73	MYB,MYB Transcription Factor Family	3	AT4G37260	+	+
NAKED PINS IN YUC MUTANTS 5		3	AT4G37590	+	+
1-amino-cyclopropane-1-carboxylate synthase 8		3	AT4G37770	+	+
ENHANCED DISEASE SUSCEPTIBILITY 5		3	AT4G39030	+	+
cellulose synthase A2	Glycosyltransferase Gene Families,Plant Cell Wall Biosynthesis Families	3	AT4G39350	+	+
BRASSINOSTEROID INSENSITIVE 1	Receptor kinase-like protein family	3	AT4G39400	+	+
	AP2-EREBP Transcription Factor Family	3	AT4G39780	+	+
D-myo-Inositol 3-Phosphate Synthase 1		3	AT4G39800	+	+
		3	AT4G39840	+	+
laccase 8		3	AT5G01040	+	+
FRIABLE 1	Miscellaneous Membrane Protein Families	3	AT5G01100	+	+
		3	AT5G01390	+	+
ROOT UV-B SENSITIVE 5		3	AT5G01510	+	+
lectin receptor kinase a4.3	Receptor kinase-like protein family	3	AT5G01560	+	+
		3	AT5G01710	+	+
SCAR family protein 4		3	AT5G01730	+	+
serine/threonine protein kinase 1	CBL-interacting serione-threonine Protein Kinases (AtCIPKs)	3	AT5G01820	+	+
	Receptor kinase-like protein family	3	AT5G01950	+	+
Salt Induced Serine rich		3	AT5G02020	+	+
expansin A9	Expansins,Miscellaneous Membrane Protein Families	3	AT5G02260	+	+
		3	AT5G02290	+	+
		3	AT5G03380	+	+
		3	AT5G03630	+	+
NAC domain containing protein 2	NAC Transcription Factor Family	3	AT5G04410	+	+
ADR1-like 2		3	AT5G04720	+	+
		3	AT5G04760	+	+
cationic amino acid transporter 6	Organic Solute Cotransporters	3	AT5G04770	+	+
peroxidase 52	Class III peroxidase	3	AT5G05340	+	+
		3	AT5G06700	+	+
sulfotransferase 2A		3	AT5G07010	+	+
CBL-interacting protein kinase 2	CBL-interacting serione-threonine Protein Kinases (AtCIPKs)	3	AT5G07070	+	+
WRKY DNA-binding protein 26	WRKY Transcription Factor Family,WRKY Transcription Factor Superfamily	3	AT5G07100	+	+
		3	AT5G11000	+	+
	Acyl Lipid Metabolism Family	3	AT5G11650	+	+
LONELY GUY 8		3	AT5G11950	+	+
		3	AT5G11970	+	+
		3	AT5G12010	+	+
	EF-hand containing proteins	3	AT5G12120	+	+
		3	AT5G12340	+	+
WRKY DNA-binding protein 75	WRKY Transcription Factor Family,WRKY Transcription Factor Superfamily	3	AT5G13080	+	+
	Miscellaneous Membrane Protein Families	3	AT5G14210	+	+
		3	AT5G14220	+	+
shaggy-like kinase 13		3	AT5G14640	+	+
plastidic GLC translocator	Monosaccharide transporter-like gene family,Organic Solute Cotransporters	3	AT5G16150	+	+
acyl activating enzyme 5		3	AT5G16370	+	+
binding partner of acd11 1		3	AT5G16840	+	+
		3	AT5G17350	+	+
		3	AT5G17460	+	+
		3	AT5G17650	+	+
	Lipid Metabolism Gene Families	3	AT5G17980	+	+
		3	AT5G18130	+	+
candidate G-protein Coupled Receptor 7		3	AT5G18520	+	+
isopentenyltransferase 5		3	AT5G19040	+	+
		3	AT5G19230	+	+
	Acyl Lipid Metabolism Family	3	AT5G19290	+	+
tubulin alpha-3		3	AT5G19770	+	+
tubulin alpha-5		3	AT5G19780	+	+
	Receptor kinase-like protein family	3	AT5G20050	+	+
	Acyl Lipid Metabolism Family	3	AT5G20840	+	+
cytokinin oxidase 7		3	AT5G21482	+	+
		3	AT5G22630	+	+
cation/H+ exchanger 9	Antiporters,Antiporter Superfamily	3	AT5G22910	+	+
amino acid permease 7	AAAP family,Organic Solute Cotransporters	3	AT5G23810	+	+
ABL interactor-like protein 3		3	AT5G24310	+	+
inositol requiring 1-1		3	AT5G24360	+	+
EMBRYO DEFECTIVE 2024		3	AT5G24400	+	+
		3	AT5G24460	+	+
		3	AT5G24610	+	+
CONSTANS-like 4	C2C2-CO-like Transcription Factor Family	3	AT5G24930	+	+
KNOTTED1-like homeobox gene 3	Homeobox Transcription Factor Family	3	AT5G25220	+	+
ferrochelatase 1		3	AT5G26030	+	+
	Monosaccharide transporter-like gene family,Organic Solute Cotransporters	3	AT5G26340	+	+
carbon/nitrogen insensitive 1		3	AT5G27420	+	+
WAVE-DAMPENED 2		3	AT5G28646	+	+
		3	AT5G35200	+	+
		3	AT5G35370	+	+
		3	AT5G35735	+	+
histidine kinase 2	Histidine Kinase,Miscellaneous Membrane Protein Families	3	AT5G35750	+	+
		3	AT5G36920	+	+
	Plant U-box protein (PUB)	3	AT5G37490	+	+
	Receptor kinase-like protein family	3	AT5G39000	+	+
	EF-hand containing proteins	3	AT5G39670	+	+
		3	AT5G40340	+	+
		3	AT5G40450	+	+
lysine histidine transporter 1	AAAP family,Organic Solute Cotransporters	3	AT5G40780	+	+
	AAAP family,Organic Solute Cotransporters	3	AT5G41800	+	+
		3	AT5G42010	+	+
		3	AT5G42050	+	+
calmodulin like 37	EF-hand containing proteins	3	AT5G42380	+	+
		3	AT5G42440	+	+
		3	AT5G42740	+	+
		3	AT5G43190	+	+
		3	AT5G43310	+	+
		3	AT5G43420	+	+
		3	AT5G43440	+	+
		3	AT5G43660	+	+
chromatin remodeling 4		3	AT5G44800	+	+
	Miscellaneous Membrane Protein Families	3	AT5G44910	+	+
		3	AT5G45410	+	+
		3	AT5G45630	+	+
		3	AT5G45840	+	+
		3	AT5G46080	+	+
		3	AT5G46910	+	+
		3	AT5G47020	+	+
2-phosphoglycolate phosphatase 2		3	AT5G47760	+	+
respiratory burst oxidase homologue D	EF-hand containing proteins,Miscellaneous Membrane Protein Families	3	AT5G47910	+	+
		3	AT5G48110	+	+
		3	AT5G48530	+	+
		3	AT5G49280	+	+
GATA transcription factor 16	C2C2-Gata Transcription Factor Family	3	AT5G49300	+	+
basic leucine-zipper 1	basic region leucine zipper (bZIP) Transcription Factor,bZIP Transcription Factor Family	3	AT5G49450	+	+
		3	AT5G49665	+	+
	Glycosyltransferase Gene Families	3	AT5G49690	+	+
		3	AT5G49900	+	+
		3	AT5G50360	+	+
		3	AT5G50860	+	+
		3	AT5G51400	+	+
		3	AT5G51460	+	+
		3	AT5G52050	+	+
LOW-TEMPERATURE-INDUCED 78		3	AT5G52310	+	+
		3	AT5G52430	+	+
		3	AT5G52750	+	+
	ACA,Primary Pumps (ATPases) Gene Families	3	AT5G53010	+	+
		3	AT5G53050	+	+
		3	AT5G53110	+	+
heat shock transcription factor A9	Heat Shock Transcription Factor Family,HSF Transcription Factor Family	3	AT5G54070	+	+
flavodoxin-like quinone reductase 1		3	AT5G54500	+	+
		3	AT5G55040	+	+
		3	AT5G56220	+	+
prenylated RAB acceptor 1.G2		3	AT5G56230	+	+
WRKY DNA-binding protein 2	WRKY Transcription Factor Family,WRKY Transcription Factor Superfamily,WRKY Transcription Factor Superfamily	3	AT5G56270	+	+
expansin A14	Expansins	3	AT5G56320	+	+
pumilio 12		3	AT5G56510	+	+
serine acetyltransferase 1;1		3	AT5G56760	+	+
beta-galactosidase 4	Glycoside Hydrolase Gene Families	3	AT5G56870	+	+
		3	AT5G57010	+	+
		3	AT5G57100	+	+
CONSTANS-like 5	C2C2-CO-like Transcription Factor Family	3	AT5G57660	+	+
		3	AT5G57910	+	+
		3	AT5G58340	+	+
with no lysine (K) kinase 4	MAP Kinase Kinase Kinase (MAPKKK) Family	3	AT5G58350	+	+
		3	AT5G59490	+	+
RING and Domain of Unknown Function 1117 2		3	AT5G59550	+	+
exocyst subunit exo70 family protein H7	EXO70 exocyst subunit family	3	AT5G59730	+	+
	Receptor kinase-like protein family	3	AT5G60310	+	+
		3	AT5G60710	+	+
ethylene response factor 104	AP2-EREBP Transcription Factor Family	3	AT5G61600	+	+
		3	AT5G61880	+	+
glycosyltransferase 18		3	AT5G62220	+	+
		3	AT5G62460	+	+
	Plant U-box protein (PUB)	3	AT5G62560	+	+
		3	AT5G62770	+	+
BTB and TAZ domain protein 1		3	AT5G63160	+	+
		3	AT5G63940	+	+
EXORDIUM like 2		3	AT5G64260	+	+
arabinogalactan protein 1		3	AT5G64310	+	+
		3	AT5G64430	+	+
CYS, MET, PRO, and GLY protein 2	Plant U-box protein (PUB)	3	AT5G64660	+	+
cellulose synthase 6	Glycosyltransferase Gene Families,Plant Cell Wall Biosynthesis Families	3	AT5G64740	+	+
Light Insensitive Period1		3	AT5G64813	+	+
elicitor peptide 2 precursor		3	AT5G64890	+	+
elicitor peptide 3 precursor		3	AT5G64905	+	+
		3	AT5G65530	+	+
SUPPRESSOR OF ACTIN 1B	Acyl Lipid Metabolism Family	3	AT5G66020	+	+
proteasome alpha subunit D2		3	AT5G66140	+	+
		3	AT5G66600	+	+
	Receptor kinase-like protein family	3	AT5G66790	+	+
mitogen-activated protein kinase kinase kinase 5	MAP Kinase Kinase Kinase (MAPKKK) Family	3	AT5G66850	+	+
sucrose nonfermenting 1(SNF1)-related protein kinase 2.3		3	AT5G66880	+	+
ABA DEFICIENT 1		3	AT5G67030	+	+
		3	AT5G67430	+	+
NAKED PINS IN YUC MUTANTS 3		3	AT5G67440	+	+
zinc-finger protein 1	C2H2 Transcription Factor Family	3	AT5G67450	+	+
dicer-like 1		2	AT1G01040	+	+
pyrophosphorylase 1		2	AT1G01050	+	+
IQ-domain 18	IQD Protein Family	2	AT1G01110	+	+
CBL-interacting protein kinase 9	CBL-interacting serione-threonine Protein Kinases (AtCIPKs)	2	AT1G01140	+
RAB GTPase homolog A3		2	AT1G01200	+	+
		2	AT1G01210	+	+
		2	AT1G01240	+
	AP2-EREBP Transcription Factor Family	2	AT1G01250	+	+
cofactor of nitrate reductase and xanthine dehydrogenase 3		2	AT1G01290	+	+
		2	AT1G01320	+	+
		2	AT1G01370	+	+
ENHANCER OF TRY AND CPC 1		2	AT1G01380	+	+
UDP-glucosyl transferase 72B3	Glycosyltransferase Gene Families	2	AT1G01420	+	+
		2	AT1G01453	+	+
		2	AT1G01490	+	+
		2	AT1G01500	+	+
cytochrome P450, family 86, subfamily A, polypeptide 4	Acyl Lipid Metabolism Family,Cytochrome P450	2	AT1G01600	+	+
GLYCEROL-3-PHOSPHATE sn-2-ACYLTRANSFERASE 4	Acyl Lipid Metabolism Family	2	AT1G01610	+	+
plasma membrane intrinsic protein 1C	Aquaporin Families,MIP family	2	AT1G01620	+	+
SIGNAL PEPTIDE PEPTIDASE-LIKE 4		2	AT1G01650	+
TON1 Recruiting Motif 33		2	AT1G01695	+	+
K+ efflux antiporter 1	Inorganic Solute Cotransporters	2	AT1G01790	+	+
		2	AT1G01800	+	+
		2	AT1G01830	+	+
	Miscellaneous Membrane Protein Families	2	AT1G01980	+	+
		2	AT1G01990	+	+
UDP-D-glucuronate 4-epimerase 2	Miscellaneous Membrane Protein Families	2	AT1G02000	+	+
	C2H2 Transcription Factor Family	2	AT1G02030	+	+
		2	AT1G02110	+	+
		2	AT1G02180	+	+
ECERIFERUM 1	Acyl Lipid Metabolism Family	2	AT1G02205	+	+
		2	AT1G02210	+	+
NAC domain containing protein 4	NAC Transcription Factor Family	2	AT1G02230	+	+
		2	AT1G02290	+	+
endo-beta-mannanase 1	Glycoside Hydrolase Gene Families	2	AT1G02310	+	+
	Glycoside Hydrolase Gene Families	2	AT1G02360	+
		2	AT1G02380	+	+
GLYCEROL-3-PHOSPHATE sn-2-ACYLTRANSFERASE 2	Acyl Lipid Metabolism Family	2	AT1G02390	+	+
gibberellin 2-oxidase 6		2	AT1G02400	+
		2	AT1G02410	+
	Glycoside Hydrolase Gene Families	2	AT1G02460	+	+
		2	AT1G02470	+	+
S-adenosylmethionine synthetase 1		2	AT1G02500	+	+
	Ion Channel Families	2	AT1G02510	+	+
nuclear encoded CLP protease 5		2	AT1G02560	+	+
MEDEA		2	AT1G02580	+	+
		2	AT1G02610	+
beta-xylosidase 2	Glycoside Hydrolase Gene Families	2	AT1G02640	+	+
cellulose synthase-like D5		2	AT1G02730	+	+
		2	AT1G02740	+	+
cellulase 2	Glycoside Hydrolase Gene Families	2	AT1G02800	+	+
		2	AT1G02813	+	+
nitrogen limitation adaptation		2	AT1G02860	+
thiamin pyrophosphokinase1		2	AT1G02880	+	+
		2	AT1G02890	+	+
LOW PSII ACCUMULATION1		2	AT1G02910	+
glutathione S-transferase 7	Glutathione S-transferase Family	2	AT1G02920	+
	basic Helix-Loop-Helix (bHLH) Transcription Factor,bHLH Transcription Factor Family	2	AT1G03040	+	+
	Miscellaneous Membrane Protein Families	2	AT1G03070	+	+
	Acyl Lipid Metabolism Family	2	AT1G03090	+	+
FANTASTIC FOUR 2		2	AT1G03170	+	+
		2	AT1G03200	+	+
		2	AT1G03240	+	+
		2	AT1G03250	+	+
		2	AT1G03280	+	+
		2	AT1G03290	+	+
DOMAIN OF UNKNOWN FUNCTION 724 1		2	AT1G03300	+	+
		2	AT1G03365	+	+
		2	AT1G03370	+
		2	AT1G03440	+	+
BRI1 SUPPRESSOR 1		2	AT1G03445	+	+
	Glycosyltransferase Gene Families	2	AT1G03520	+	+
		2	AT1G03610	+	+
		2	AT1G03620	+	+
protochlorophyllide oxidoreductase C		2	AT1G03630	+	+
		2	AT1G03700	+	+
		2	AT1G03730	+	+
		2	AT1G03740	+
		2	AT1G03830	+	+
glutaredoxin 13		2	AT1G03850		+
prohibitin 2		2	AT1G03860	+	+
		2	AT1G03935	+	+
phospholipid sterol acyl transferase 1	Acyl Lipid Metabolism Family	2	AT1G04010	+	+
		2	AT1G04030	+	+
STOMATAL DENSITY AND DISTRIBUTION 1	Subtilisin-like Serine Proteases	2	AT1G04110	+	+
tetratricopeptide repeat 2		2	AT1G04130	+	+
		2	AT1G04140	+	+
		2	AT1G04230	+	+
AUXIN RESISTANT 3		2	AT1G04250	+	+
		2	AT1G04280	+	+
		2	AT1G04330	+	+
Ethylene-responsive element binding factor 14	AP2-EREBP Transcription Factor Family	2	AT1G04370	+	+
		2	AT1G04380		+
cryptochrome 2		2	AT1G04400	+	+
		2	AT1G04425	+	+
		2	AT1G04430	+	+
		2	AT1G04490	+	+
plasmodesmata-located protein 2		2	AT1G04520	+	+
indole-3-acetic acid inducible 12		2	AT1G04550	+	+
	Miscellaneous Membrane Protein Families	2	AT1G04560	+	+
		2	AT1G04570	+	+
myosin XI A	Myosin	2	AT1G04600	+	+
YUCCA 3		2	AT1G04610	+	+
potassium channel beta subunit 1		2	AT1G04690	+	+
		2	AT1G04770	+	+
tubulin alpha-4 chain		2	AT1G04820	+	+
		2	AT1G04840	+	+
	C2H2 Transcription Factor Family	2	AT1G04850	+	+
sucrose phosphate synthase 3F	Glycosyltransferase Gene Families	2	AT1G04920	+	+
		2	AT1G04985	+	+
	EF-hand containing proteins	2	AT1G05150	+	+
	Glycosyltransferase Gene Families	2	AT1G05170	+	+
embryo defective 2394		2	AT1G05190	+	+
glutamate receptor 3.4	Ion Channel Families	2	AT1G05200	+	+
	Class III peroxidase	2	AT1G05240	+	+
RARE COLD INDUCIBLE GENE 3	Class III peroxidase	2	AT1G05260	+	+
zinc transporter 5 precursor	Inorganic Solute Cotransporters	2	AT1G05300	+
		2	AT1G05320	+	+
		2	AT1G05340	+	+
Killing Me Slowly 2		2	AT1G05360	+	+
		2	AT1G05370	+	+
ovate family protein 12		2	AT1G05420	+	+
	Lipid Metabolism Gene Families	2	AT1G05450	+	+
COTYLEDON VASCULAR PATTERN 2		2	AT1G05470	+	+
UDP-glucosyltransferase 75B1	Glycosyltransferase Gene Families	2	AT1G05560	+	+
		2	AT1G05562	+	+
uridine-ribohydrolase 2		2	AT1G05620	+
inositol-polyphosphate 5-phosphatase 13	Acyl Lipid Metabolism Family	2	AT1G05630	+	+
	Miscellaneous Membrane Protein Families	2	AT1G05640	+	+
	Glycoside Hydrolase Gene Families	2	AT1G05650	+	+
	Glycosyltransferase Gene Families	2	AT1G05670	+	+
		2	AT1G05785	+	+
RAB GTPase homolog A5E		2	AT1G05810	+	+
		2	AT1G05870	+	+
		2	AT1G05910	+	+
		2	AT1G05920	+	+
SALT TOLERANCE	Orphan Transcription Factor Family	2	AT1G06040	+
SKP1/ASK-interacting protein 16		2	AT1G06110	+	+
octadecanoid-responsive Arabidopsis AP2/ERF 59	AP2-EREBP Transcription Factor Family	2	AT1G06160	+	+
Rho-N 1		2	AT1G06190	+	+
		2	AT1G06240	+	+
acyl-CoA oxidase 3	Acyl Lipid Metabolism Family	2	AT1G06290	+	+
acyl-CoA oxidase 6	Acyl Lipid Metabolism Family	2	AT1G06310	+	+
GSK3/SHAGGY-like protein kinase 1		2	AT1G06390	+	+
		2	AT1G06470	+	+
GLYCEROL-3-PHOSPHATE sn-2-ACYLTRANSFERASE 1	Acyl Lipid Metabolism Family	2	AT1G06520		+
phytoene desaturation 1		2	AT1G06570	+	+
		2	AT1G06590	+	+
		2	AT1G06630	+	+
		2	AT1G06650	+	+
MUSTANG 3		2	AT1G06740	+	+
galacturonosyltransferase 6	Glycosyltransferase Gene Families	2	AT1G06780	+	+
		2	AT1G06790	+	+
		2	AT1G06840	+
		2	AT1G06930	+	+
translocon at the inner envelope membrane of chloroplasts 110		2	AT1G06950	+	+
cation/hydrogen exchanger 14	Antiporters,Antiporter Superfamily	2	AT1G06970	+	+
		2	AT1G06980	+	+
exocyst subunit exo70 family protein B2	EXO70 exocyst subunit family	2	AT1G07000	+
	Chloroplast and Mitochondria gene families	2	AT1G07020	+	+
	Chloroplast and Mitochondria gene families	2	AT1G07030	+	+
LIGHT SENSITIVE HYPOCOTYLS 6		2	AT1G07090	+	+
		2	AT1G07210	+	+
UDP-glucosyl transferase 71C4	Glycosyltransferase Gene Families	2	AT1G07250	+	+
	Core DNA replication machinery	2	AT1G07270	+	+
		2	AT1G07280	+	+
		2	AT1G07330	+	+
receptor like protein 1		2	AT1G07390	+	+
highly ABA-induced PP2C gene 2	PP2C-type phosphatases	2	AT1G07430	+	+
		2	AT1G07476	+	+
FTSH protease 10	FtsH: AAA ATP-dependent zinc metallopeptidase	2	AT1G07510	+
TRF-like 2		2	AT1G07540	+	+
	Receptor kinase-like protein family	2	AT1G07550	+	+
		2	AT1G07580	+	+
	Receptor kinase-like protein family	2	AT1G07650	+	+
endomembrane-type CA-ATPase 4	Primary Pumps (ATPases) Gene Families,Primary Pumps (ATPases) Gene Family (2)	2	AT1G07670	+
3-ketoacyl-CoA synthase 3	Acyl Lipid Metabolism Family	2	AT1G07720	+	+
exocyst subunit exo70 family protein H6	EXO70 exocyst subunit family	2	AT1G07725	+
		2	AT1G07820	+	+
	Glycosyltransferase Gene Families	2	AT1G07850	+	+
		2	AT1G07870	+
ascorbate peroxidase 1		2	AT1G07890	+	+
	EF-1alpha,Eukaryotic Initiation Factor Gene Family	2	AT1G07920	+
		2	AT1G07990	+	+
tyrosylprotein sulfotransferase		2	AT1G08030	+	+
MORPHEUS MOLECULE		2	AT1G08060	+	+
		2	AT1G08165	+	+
		2	AT1G08170	+	+
		2	AT1G08180	+	+
vacuolar protein sorting 41		2	AT1G08190	+	+
UDP-D-apiose/UDP-D-xylose synthase 2		2	AT1G08200	+
arogenate dehydratase 6		2	AT1G08250	+	+
		2	AT1G08270	+	+
		2	AT1G08315	+
		2	AT1G08390	+	+
BRI1 suppressor 1 (BSU1)-like 2		2	AT1G08420	+	+
strictosidine synthase-like 3		2	AT1G08470	+	+
chloroplastic NIFS-like cysteine desulfurase		2	AT1G08490	+	+
fatty acyl-ACP thioesterases B	Acyl Lipid Metabolism Family	2	AT1G08510	+	+
threonine aldolase 1		2	AT1G08630	+	+
ARF GAP-like zinc finger-containing protein ZIGA4		2	AT1G08680	+	+
		2	AT1G08800	+
	C2H2 Transcription Factor Family,Monosaccharide transporter-like gene family,Organic Solute Cotransporters	2	AT1G08900	+	+
		2	AT1G08910	+	+
ERD (early response to dehydration) six-like 1	Monosaccharide transporter-like gene family,Organic Solute Cotransporters	2	AT1G08920	+
EARLY RESPONSE TO DEHYDRATION 6	Monosaccharide transporter-like gene family,Organic Solute Cotransporters	2	AT1G08930	+
		2	AT1G08985	+	+
plant glycogenin-like starch initiation protein 5	Glycosyltransferase Gene Families	2	AT1G08990	+	+
	PP2C-type phosphatases	2	AT1G09160	+	+
secretion-associated RAS super family 1		2	AT1G09180	+	+
		2	AT1G09260	+	+
importin alpha isoform 4		2	AT1G09270	+	+
galactinol synthase 3	Glycosyltransferase Gene Families	2	AT1G09350	+	+
		2	AT1G09390	+	+
glucose-6-phosphate dehydrogenase 4		2	AT1G09420	+	+
germin-like protein 5		2	AT1G09560	+
phytochrome A	Histidine Kinase	2	AT1G09570	+	+
		2	AT1G09730	+	+
		2	AT1G09750	+	+
		2	AT1G09794	+	+
		2	AT1G09870	+	+
		2	AT1G09920	+	+
		2	AT1G09940	+
RESPONSE TO ABA AND SALT 1		2	AT1G09950	+
sucrose transporter 4	Organic Solute Cotransporters,Sucrose-H+ symporters	2	AT1G09960	+	+
	Receptor kinase-like protein family	2	AT1G09970	+	+
		2	AT1G09980	+	+
		2	AT1G10020	+	+
homolog of yeast ergosterol28		2	AT1G10030	+	+
branched-chain amino acid transaminase 1		2	AT1G10060	+	+
branched-chain amino acid transaminase 2		2	AT1G10070	+	+
		2	AT1G10090	+	+
		2	AT1G10110	+	+
	basic Helix-Loop-Helix (bHLH) Transcription Factor,bHLH Transcription Factor Family	2	AT1G10120	+	+
endoplasmic reticulum-type calcium-transporting ATPase 3	ACA,Primary Pumps (ATPases) Gene Families,Primary Pumps (ATPases) Gene Family (2)	2	AT1G10130	+	+
		2	AT1G10140	+	+
		2	AT1G10150	+	+
NF-X-like 1		2	AT1G10170	+	+
WLIM1		2	AT1G10200	+	+
mitogen-activated protein kinase 1	MAP Kinase (MAPK) Family	2	AT1G10210	+	+
		2	AT1G10220	+	+
		2	AT1G10320	+	+
glutathione S-transferase TAU 18	Glutathione S-transferase Family	2	AT1G10360	+	+
protein phosphatase 2A-2		2	AT1G10430	+	+
germin-like protein 7		2	AT1G10460	+	+
response regulator 4	Response Regulator	2	AT1G10470	+	+
zinc finger protein 5	C2H2 Transcription Factor Family	2	AT1G10480	+
		2	AT1G10490	+	+
DNA polymerase {lambda}		2	AT1G10520	+	+
xyloglucan:xyloglucosyl transferase 33	Glycoside Hydrolase Gene Families	2	AT1G10550	+	+
	Glycoside Hydrolase Gene Families	2	AT1G10640	+	+
		2	AT1G10717	+	+
	Acyl Lipid Metabolism Family	2	AT1G10740	+	+
		2	AT1G10747	+	+
ferredoxin 1		2	AT1G10960	+	+
		2	AT1G11010	+	+
		2	AT1G11110	+	+
		2	AT1G11160	+	+
		2	AT1G11170	+	+
		2	AT1G11175	+	+
		2	AT1G11200	+	+
		2	AT1G11220	+	+
		2	AT1G11230	+	+
syntaxin of plants 125	SNAREs	2	AT1G11250	+	+
MILDEW RESISTANCE LOCUS O 2	Miscellaneous Membrane Protein Families,MLO proteins	2	AT1G11310	+
		2	AT1G11320	+	+
	Carbohydrate Esterase Gene Families	2	AT1G11370	+	+
		2	AT1G11410	+	+
methylesterase PCR A	Carbohydrate Esterase Gene Families,Carbohydrate Esterase Gene Families	2	AT1G11580	+	+
		2	AT1G11670	+	+
		2	AT1G11710	+	+
starch synthase 3	Glycosyltransferase Gene Families	2	AT1G11720	+
		2	AT1G11800	+	+
glyoxalase I homolog		2	AT1G11840	+	+
	Trihelix Transcription Factor Family	2	AT1G11850	+	+
		2	AT1G11880	+	+
aspartic proteinase A1		2	AT1G11910	+	+
flavin monooxygenase		2	AT1G12200	+	+
		2	AT1G12230	+	+
	Glycoside Hydrolase Gene Families	2	AT1G12240	+	+
		2	AT1G12320	+	+
		2	AT1G12340	+	+
		2	AT1G12390	+	+
ACT domain repeat 8		2	AT1G12420	+	+
armadillo repeat kinesin 3	Kinesins	2	AT1G12430	+	+
	Receptor kinase-like protein family	2	AT1G12460	+	+
copper chaperone for SOD1		2	AT1G12520	+	+
expansin A7	Expansins	2	AT1G12560	+	+
		2	AT1G12590	+	+
		2	AT1G12600	+	+
lysophospholipid acyltransferase 1		2	AT1G12640	+	+
		2	AT1G12650	+	+
		2	AT1G12700	+	+
phloem protein 2-A12		2	AT1G12710	+	+
UDP-D-glucose/UDP-D-galactose 4-epimerase 1		2	AT1G12780	+	+
nitrate transporter2.5	Inorganic Solute Cotransporters	2	AT1G12940	+	+
	Cytoplasmic ribosomal protein gene family	2	AT1G12960	+	+
		2	AT1G13120	+	+
autoinhibited Ca2+/ATPase II	ACA,Acyl Lipid Metabolism Family,Primary Pumps (ATPases) Gene Families	2	AT1G13210		+
		2	AT1G13230	+	+
ROTUNDIFOLIA like 17		2	AT1G13245	+
galacturonosyltransferase-like 3	Glycosyltransferase Gene Families	2	AT1G13250	+	+
related to ABI3/VP1 1	RAV Transcription Factor Family	2	AT1G13260	+	+
		2	AT1G13350	+	+
GT-1	Trihelix Transcription Factor Family	2	AT1G13450	+	+
		2	AT1G13460	+	+
		2	AT1G13550		+
		2	AT1G13630	+	+
		2	AT1G13650	+	+
ABI five binding protein 2		2	AT1G13740	+	+
		2	AT1G13780	+	+
		2	AT1G13810	+	+
QUASIMODO2 LIKE 1		2	AT1G13860	+	+
purple acid phosphatase 2	Miscellaneous Membrane Protein Families	2	AT1G13900	+	+
		2	AT1G13930	+	+
GNOM		2	AT1G13980	+
		2	AT1G14010	+	+
lysine methyltransferase (LSMT)-like		2	AT1G14030	+	+
fucosyltransferase 6	Family of Arabidopsis genes related to Xyloglucan Fucosyltransferase1,Glycosyltransferase Gene Families	2	AT1G14080	+	+
		2	AT1G14120	+	+
		2	AT1G14180	+	+
		2	AT1G14240	+	+
		2	AT1G14260	+	+
		2	AT1G14270	+	+
sphingoid base hydroxylase 2	Acyl Lipid Metabolism Family	2	AT1G14290	+	+
		2	AT1G14300	+	+
FOUR LIPS	MYB,MYB Transcription Factor Family	2	AT1G14350	+	+
		2	AT1G14390	+	+
ubiquitin carrier protein 1		2	AT1G14400	+	+
		2	AT1G14430	+	+
myo-inositol oxygenase 1		2	AT1G14520	+	+
		2	AT1G14570	+	+
	C2H2 Transcription Factor Family	2	AT1G14580	+	+
		2	AT1G14640	+	+
basic pentacysteine 2	BBR/BPC Transcription Factor Family	2	AT1G14685	+	+
		2	AT1G14688	+	+
purple acid phosphatase 3		2	AT1G14700	+	+
		2	AT1G14710	+	+
	Chloroplast and Mitochondria gene families	2	AT1G14730		+
TITANIA 1		2	AT1G14740	+
		2	AT1G14780	+
PLANT CADMIUM RESISTANCE 2		2	AT1G14870		+
		2	AT1G14890	+	+
high mobility group A		2	AT1G14900	+	+
		2	AT1G14930	+	+
		2	AT1G15010	+
RING-H2 finger A2A	C3H Transcription Factor Family	2	AT1G15100	+	+
		2	AT1G15120	+	+
		2	AT1G15165	+	+
		2	AT1G15170	+
		2	AT1G15175	+	+
		2	AT1G15190	+	+
		2	AT1G15280	+	+
methyl-CPG-binding domain 10		2	AT1G15340	+	+
glyoxylase I 4		2	AT1G15380	+	+
peptide deformylase 1A		2	AT1G15390	+	+
periodic tryptophan protein 2		2	AT1G15440	+	+
ATP-binding cassette G40	ABC Superfamily,ABC transporters,ABC transporters (Smart Lab)	2	AT1G15520		+
indole-3-acetic acid inducible 5		2	AT1G15580	+
		2	AT1G15590	+	+
		2	AT1G15640	+
centromere protein C		2	AT1G15660	+	+
		2	AT1G15730	+	+
		2	AT1G15740	+	+
TOPLESS		2	AT1G15750	+
		2	AT1G15757	+	+
		2	AT1G15810	+	+
		2	AT1G15825	+	+
		2	AT1G15830	+	+
		2	AT1G15840	+	+
Photosynthetic NDH subcomplex B 1		2	AT1G15980	+	+
		2	AT1G16020	+	+
heat shock protein 70B	HSP70s	2	AT1G16030		+
wall associated kinase-like 7		2	AT1G16090	+	+
wall associated kinase-like 1	Receptor kinase-like protein family	2	AT1G16120	+	+
wall associated kinase-like 5	Receptor kinase-like protein family	2	AT1G16160		+
		2	AT1G16210	+	+
		2	AT1G16320		+
cyclin b3;1	Core Cell Cycle Genes	2	AT1G16330	+	+
		2	AT1G16489	+	+
		2	AT1G16500	+	+
		2	AT1G16515	+	+
		2	AT1G16670		+
		2	AT1G16790	+	+
		2	AT1G16850	+
SH2 domain protein A		2	AT1G17040	+	+
		2	AT1G17080	+	+
haem-binding protein 1		2	AT1G17100	+	+
interactor of constitutive active rops 1		2	AT1G17140	+	+
		2	AT1G17145	+
glutathione S-transferase TAU 24	Glutathione S-transferase Family,Miscellaneous Membrane Protein Families	2	AT1G17170	+
glutathione S-transferase tau 26	Glutathione S-transferase Family	2	AT1G17190	+	+
		2	AT1G17230	+	+
		2	AT1G17345	+	+
oligouridylate binding protein 1B		2	AT1G17370	+	+
jasmonate-zim-domain protein 5	tify family	2	AT1G17380	+	+
		2	AT1G17430	+	+
ENHANCED ETHYLENE RESPONSE 4		2	AT1G17440	+	+
		2	AT1G17450	+	+
	Single Myb Histone (SMH)	2	AT1G17520	+	+
nuclear factor Y, subunit A8	CCAAT-HAP2 Transcription Factor Family	2	AT1G17590	+	+
		2	AT1G17630	+	+
nucleolar factor 1		2	AT1G17690	+	+
vacuolar protein sorting 46.1		2	AT1G17730	+	+
3-phosphoglycerate dehydrogenase		2	AT1G17745	+	+
PEP1 receptor 2	Receptor kinase-like protein family	2	AT1G17750	+	+
		2	AT1G17760	+	+
		2	AT1G17830	+
ATP-binding cassette G11	ABC Superfamily,ABC transporters	2	AT1G17840	+	+
		2	AT1G17860	+
ETHYLENE-DEPENDENT GRAVITROPISM-DEFICIENT AND YELLOW-GREEN-LIKE 3		2	AT1G17870	+	+
		2	AT1G17890	+
myb domain protein 52	MYB,MYB Transcription Factor Family	2	AT1G17950	+	+
		2	AT1G17960	+	+
		2	AT1G18090	+	+
		2	AT1G18100	+	+
	MAP Kinase (MAPK) Family	2	AT1G18150	+
golgin candidate 2		2	AT1G18190	+	+
EMS-mutagenized bri1 suppressor 5		2	AT1G18260	+	+
		2	AT1G18265	+	+
		2	AT1G18270	+	+
nudix hydrolase homolog 4		2	AT1G18300	+	+
		2	AT1G18335	+	+
	Acyl Lipid Metabolism Family	2	AT1G18360	+	+
BR enhanced expression 1	basic Helix-Loop-Helix (bHLH) Transcription Factor,bHLH Transcription Factor Family	2	AT1G18400	+	+
	C3H Transcription Factor Family	2	AT1G18470	+	+
methylthioalkylmalate synthase-like 4		2	AT1G18500	+	+
	Kinesins	2	AT1G18550	+	+
		2	AT1G18560	+	+
myb domain protein 51	MYB,MYB Transcription Factor Family	2	AT1G18570	+	+
IMPAIRED IN BABA-INDUCED STERILITY 1		2	AT1G18670	+	+
		2	AT1G18700	+
		2	AT1G18740	+	+
		2	AT1G18745	+	+
AGAMOUS-like 65	MADS Transcription Factor Family,MADS-box Transcription Factor Family,Type I MADS box	2	AT1G18750	+	+
	zinc finger-homeobox gene family	2	AT1G18835	+	+
isochorismate synthase 2		2	AT1G18870	+	+
		2	AT1G18900	+	+
	Nodulin-like protein family	2	AT1G18940	+	+
		2	AT1G18990	+	+
		2	AT1G19000	+	+
response regulator 7	Response Regulator	2	AT1G19050	+	+
		2	AT1G19110	+	+
	Glycoside Hydrolase Gene Families	2	AT1G19170	+	+
auxin response factor 19	ARF Transcription Factor Family	2	AT1G19220	+	+
	EF-hand containing proteins,Miscellaneous Membrane Protein Families	2	AT1G19230	+	+
PARVUS	Glycosyltransferase Gene Families	2	AT1G19300	+	+
		2	AT1G19340	+	+
		2	AT1G19380		+
		2	AT1G19396	+	+
3-ketoacyl-CoA synthase 4	Acyl Lipid Metabolism Family,Miscellaneous Membrane Protein Families	2	AT1G19440	+	+
		2	AT1G19485	+	+
	basic region leucine zipper (bZIP) Transcription Factor,bZIP Transcription Factor Family	2	AT1G19490	+	+
gamma carbonic anhydrase 1		2	AT1G19580	+	+
		2	AT1G19660	+	+
chlorophyllase 1		2	AT1G19670	+	+
BEL1-like homeodomain 10	Homeobox Transcription Factor Family	2	AT1G19700	+	+
		2	AT1G19750	+	+
purine permease 14	Organic Solute Cotransporters	2	AT1G19770	+	+
		2	AT1G19830	+	+
MONOPTEROS	ARF Transcription Factor Family	2	AT1G19850	+	+
		2	AT1G19860	+	+
		2	AT1G19880	+	+
male-gamete-specific histone H3		2	AT1G19890	+	+
		2	AT1G19980	+	+
tubulin beta-5 chain		2	AT1G20010	+	+
		2	AT1G20080	+	+
		2	AT1G20110	+	+
		2	AT1G20300	+	+
sterol methyltransferase 2		2	AT1G20330	+
cold-regulated 47		2	AT1G20440	+
EARLY RESPONSIVE TO DEHYDRATION 10		2	AT1G20450	+
	Miscellaneous Membrane Protein Families,Monolignol Biosynthesis	2	AT1G20480	+	+
	EF-hand containing proteins,Miscellaneous Membrane Protein Families,Monolignol Biosynthesis	2	AT1G20490	+	+
OPC-8:0 CoA ligase1	EF-hand containing proteins,Miscellaneous Membrane Protein Families,Monolignol Biosynthesis	2	AT1G20510	+	+
catalase 1		2	AT1G20630	+	+
	NLP Transcription Factor Family	2	AT1G20640	+	+
		2	AT1G20770	+	+
		2	AT1G20790	+	+
		2	AT1G20816	+	+
tonoplast monosaccharide transporter1	Monosaccharide transporter-like gene family,Organic Solute Cotransporters	2	AT1G20840	+	+
		2	AT1G20880	+	+
		2	AT1G20940	+	+
		2	AT1G20970	+	+
squamosa promoter binding protein-like 14	SBP Transcription Factor Family,Superfamily of zinc-coordinating DNA-binding proteins	2	AT1G20980	+	+
		2	AT1G21000	+	+
		2	AT1G21050	+	+
indole glucosinolate O-methyltransferase 2	Monolignol Biosynthesis	2	AT1G21120	+
indole glucosinolate O-methyltransferase 4	Monolignol Biosynthesis	2	AT1G21130	+	+
	Nodulin-like protein family	2	AT1G21140		+
	Acyl Lipid Metabolism Family	2	AT1G21400	+	+
SCARECROW-like 1	GRAS Gene Family,GRAS Transcription Factor Family	2	AT1G21450		+
	Miscellaneous Membrane Protein Families	2	AT1G21460	+	+
		2	AT1G21470	+	+
		2	AT1G21480	+	+
		2	AT1G21510	+	+
		2	AT1G21528	+	+
	EF-hand containing proteins	2	AT1G21540	+	+
	EF-hand containing proteins	2	AT1G21550	+	+
		2	AT1G21560	+	+
		2	AT1G21580	+	+
NAD kinase 2		2	AT1G21640	+	+
		2	AT1G21660	+	+
		2	AT1G21670	+	+
		2	AT1G21680	+	+
8-oxoguanine-DNA glycosylase 1		2	AT1G21710	+	+
		2	AT1G21722	+	+
	Kinesins	2	AT1G21730	+	+
		2	AT1G21740	+	+
F-box protein 7		2	AT1G21760	+	+
		2	AT1G21830	+
lysm domain GPI-anchored protein 1 precursor		2	AT1G21880	+	+
Usually multiple acids move in and out Transporters 19	Nodulin-like protein family	2	AT1G21890	+	+
dehydration response element-binding protein 26	AP2-EREBP Transcription Factor Family	2	AT1G21910	+
		2	AT1G21920	+	+
		2	AT1G21928	+	+
		2	AT1G21930	+	+
		2	AT1G21990	+	+
membrane-anchored ubiquitin-fold protein 6 precursor		2	AT1G22050	+	+
		2	AT1G22065	+	+
trehalose-6-phosphate phosphatase C		2	AT1G22210	+	+
		2	AT1G22230	+
		2	AT1G22250	+	+
phytochrome-associated protein phosphatase type 2C	PP2C-type phosphatases	2	AT1G22280	+
methyl-CPG-binding domain 8		2	AT1G22310	+	+
	Glycosyltransferase Gene Families	2	AT1G22400	+	+
		2	AT1G22410	+	+
		2	AT1G22470	+
Arabidopsis toxicos en levadura 15		2	AT1G22500	+	+
		2	AT1G22520	+	+
	Organic Solute Cotransporters	2	AT1G22550	+	+
	Organic Solute Cotransporters	2	AT1G22570	+	+
	Lipid Metabolism Gene Families	2	AT1G22610	+	+
myb domain protein 3	MYB,MYB Transcription Factor Family	2	AT1G22640	+	+
alkaline/neutral invertase D		2	AT1G22650	+	+
		2	AT1G22750	+	+
GIGANTEA		2	AT1G22770	+
		2	AT1G22800		+
	AP2-EREBP Transcription Factor Family	2	AT1G22810	+
cellulase 5	Glycoside Hydrolase Gene Families	2	AT1G22880	+	+
		2	AT1G22882	+	+
		2	AT1G22885	+	+
		2	AT1G22890		+
		2	AT1G22930	+	+
		2	AT1G22960	+	+
		2	AT1G22980	+	+
		2	AT1G23000	+	+
ferric reduction oxidase 3	Miscellaneous Membrane Protein Families	2	AT1G23020	+	+
	Plant U-box protein (PUB)	2	AT1G23030	+	+
		2	AT1G23050	+	+
MICROTUBULE DESTABILIZING PROTEIN 40		2	AT1G23060	+	+
KNOTTED1-like homeobox gene 6	Homeobox Transcription Factor Family	2	AT1G23380	+	+
		2	AT1G23450	+	+
proline-rich extensin-like receptor kinase 12	Trihelix Transcription Factor Family	2	AT1G23540	+	+
similar to RCD one 2		2	AT1G23550	+	+
		2	AT1G23750	+	+
aldehyde dehydrogenase 2B7	Aldehyde Dehydrogenase Superfamily	2	AT1G23800	+
		2	AT1G23890	+	+
		2	AT1G23970	+	+
		2	AT1G23980	+	+
		2	AT1G24140	+
		2	AT1G24160	+	+
		2	AT1G24530	+	+
		2	AT1G24560	+	+
		2	AT1G24600	+	+
microtubule-associated proteins 70-2		2	AT1G24764	+	+
anthranilate synthase beta subunit 1		2	AT1G25220	+
		2	AT1G25240	+	+
		2	AT1G25275	+	+
		2	AT1G25360	+	+
		2	AT1G25370	+	+
		2	AT1G25375	+	+
NAD+ transporter 2	Chloroplast and Mitochondria gene families	2	AT1G25380	+	+
		2	AT1G25460	+	+
TEMPRANILLO 1	ABI3VP1 Transcription Factor Family	2	AT1G25560		+
		2	AT1G25570	+	+
SUPPRESSOR OF GAMMA RADIATION 1		2	AT1G25580	+	+
		2	AT1G26208	+	+
	Acyl Lipid Metabolism Family	2	AT1G26270	+	+
		2	AT1G26370	+	+
		2	AT1G26420	+
ureide permease 5		2	AT1G26440	+
		2	AT1G26490	+	+
		2	AT1G26500	+	+
		2	AT1G26558	+	+
CLAVATA3/ESR-RELATED 9		2	AT1G26600	+	+
	SNAREs	2	AT1G26670	+	+
		2	AT1G26730	+	+
expansin A10	Expansins	2	AT1G26770	+	+
		2	AT1G26773	+	+
	Glycosyltransferase Gene Families	2	AT1G26810	+	+
		2	AT1G26930	+	+
KIDARI		2	AT1G26945	+	+
		2	AT1G26976	+	+
	Glycosyltransferase Gene Families	2	AT1G27120	+	+
		2	AT1G27180	+	+
	Receptor kinase-like protein family	2	AT1G27190	+	+
		2	AT1G27210	+	+
squamosa promoter-like 11	SBP Transcription Factor Family,Superfamily of zinc-coordinating DNA-binding proteins	2	AT1G27360	+	+
adenine phosphoribosyl transferase 1	Miscellaneous Membrane Protein Families,Phosphoribosyltransferases (PRT)	2	AT1G27450	+	+
EXECUTER 2		2	AT1G27510	+	+
	Glycoside Hydrolase Gene Families	2	AT1G27520	+	+
		2	AT1G27530	+	+
		2	AT1G27670	+	+
		2	AT1G27690	+	+
salt tolerance zinc finger	C2H2 Transcription Factor Family	2	AT1G27730	+	+
		2	AT1G27750	+	+
		2	AT1G27840	+	+
		2	AT1G27890	+	+
		2	AT1G27900	+	+
glycosylphosphatidylinositol-anchored lipid protein transfer 1	Acyl Lipid Metabolism Family	2	AT1G27950	+	+
dihydrosphingosine phosphate lyase		2	AT1G27980	+	+
B-box domain protein 13	C2C2-CO-like Transcription Factor Family	2	AT1G28050	+	+
		2	AT1G28130	+	+
		2	AT1G28135	+	+
FH interacting protein 1		2	AT1G28200	+
		2	AT1G28240		+
ralf-like 4		2	AT1G28270	+	+
		2	AT1G28280	+
LEAFY COTYLEDON 2	ABI3VP1 Transcription Factor Family	2	AT1G28300	+	+
dormancy-associated protein-like 1		2	AT1G28330	+	+
		2	AT1G28350	+	+
ERF domain protein 12	AP2-EREBP Transcription Factor Family	2	AT1G28360	+	+
ERF domain protein 11	AP2-EREBP Transcription Factor Family	2	AT1G28370	+	+
necrotic spotted lesions 1		2	AT1G28380	+
		2	AT1G28400	+	+
HAESA-like 1	Receptor kinase-like protein family	2	AT1G28440	+	+
NAC domain containing protein 10	NAC Transcription Factor Family	2	AT1G28470		+
syntaxin of plants 61	SNAREs	2	AT1G28490	+	+
SHOOT REDIFFERENTIATION DEFECTIVE 2		2	AT1G28560	+	+
		2	AT1G28600	+	+
		2	AT1G28680	+	+
		2	AT1G28760	+	+
		2	AT1G28815	+	+
TRICHOME BIREFRINGENCE-LIKE 38		2	AT1G29050	+	+
		2	AT1G29100		+
CBL-interacting protein kinase 18	CBL-interacting serione-threonine Protein Kinases (AtCIPKs) ,Miscellaneous Membrane Protein Families	2	AT1G29230	+	+
		2	AT1G29240	+	+
ENDOPLASMIC RETICULUM RETENTION DEFECTIVE 2	Miscellaneous Membrane Protein Families	2	AT1G29330	+	+
COLD REGULATED 314 INNER MEMBRANE 1		2	AT1G29395	+	+
MEI2-like protein 5		2	AT1G29400	+	+
		2	AT1G29430	+	+
		2	AT1G29465	+	+
	Eukaryotic Initiation Factor Gene Family	2	AT1G29550	+	+
eukaryotic translation Initiation Factor 4E3	Eukaryotic Initiation Factor Gene Family	2	AT1G29590	+	+
		2	AT1G29640	+	+
		2	AT1G29680		+
		2	AT1G29785	+	+
		2	AT1G29790	+	+
chlorophyll A/B binding protein 1	Chloroplast and Mitochondria gene families	2	AT1G29930	+	+
		2	AT1G29980	+	+
gibberellin 2-oxidase		2	AT1G30040	+	+
		2	AT1G30050	+	+
		2	AT1G30090	+	+
nine-cis-epoxycarotenoid dioxygenase 5		2	AT1G30100	+	+
pyruvate dehydrogenase E1 beta	Acyl Lipid Metabolism Family	2	AT1G30120	+	+
		2	AT1G30130	+	+
		2	AT1G30190	+
		2	AT1G30200	+	+
inositol transporter 2	Monosaccharide transporter-like gene family,Organic Solute Cotransporters	2	AT1G30220	+	+
		2	AT1G30280	+	+
		2	AT1G30282	+	+
		2	AT1G30300	+	+
auxin response factor 6	ARF Transcription Factor Family	2	AT1G30330	+	+
early-responsive to dehydration 4		2	AT1G30360	+	+
ATP-binding cassette C1	ABC Superfamily,ABC transporters,ABC transporters	2	AT1G30400	+	+
ATP-binding cassette C12	ABC Superfamily,ABC transporters,ABC transporters	2	AT1G30410	+	+
		2	AT1G30430	+	+
		2	AT1G30550	+	+
glycerol-3-phosphate permease 3	Organic Solute Cotransporters	2	AT1G30560	+	+
		2	AT1G30580	+	+
		2	AT1G30590	+	+
	Subtilisin-like Serine Proteases	2	AT1G30600	+	+
WRKY DNA-binding protein 14	WRKY Transcription Factor Family,WRKY Transcription Factor Superfamily	2	AT1G30650	+	+
		2	AT1G30660	+
		2	AT1G30690	+	+
		2	AT1G30700	+
		2	AT1G30720		+
		2	AT1G30795	+	+
		2	AT1G30800	+	+
Jumonji domain-containing protein 18	JUMONJI Transcription Factor Family	2	AT1G30810	+	+
		2	AT1G30814	+	+
		2	AT1G30820		+
		2	AT1G30860	+	+
N-acetylglucosamine-1-phosphate uridylyltransferase 1		2	AT1G31070	+	+
K+ uptake permease 10	Inorganic Solute Cotransporters	2	AT1G31120	+	+
GORDITA	MADS Transcription Factor Family,MADS-box Transcription Factor Family,Type I MADS box	2	AT1G31140	+	+
		2	AT1G31150	+	+
HISTIDINE TRIAD NUCLEOTIDE-BINDING 2		2	AT1G31160	+	+
sulfiredoxin		2	AT1G31170	+	+
microRNA167D		2	AT1G31173	+	+
		2	AT1G31240	+	+
		2	AT1G31300	+	+
LOB domain-containing protein 4	AS2 family,Lateral Organ Boundaries Gene Family	2	AT1G31320	+	+
		2	AT1G31450	+	+
		2	AT1G31550	+	+
ROP (rho of plants) guanine nucleotide exchange factor 14		2	AT1G31650	+	+
		2	AT1G31730	+	+
FRIGIDA like 2		2	AT1G31814	+	+
Secretory carrier membrane protein 5	Miscellaneous Membrane Protein Families	2	AT1G32050	+	+
phosphoribulokinase		2	AT1G32060	+	+
		2	AT1G32080	+	+
basic region/leucine zipper transcription factor 68	basic region leucine zipper (bZIP) Transcription Factor,bZIP Transcription Factor Family	2	AT1G32150		+
		2	AT1G32172	+	+
	Acyl Lipid Metabolism Family	2	AT1G32200	+	+
tobamovirus multiplication 2A		2	AT1G32400	+	+
nitrate transporter 1.5	Organic Solute Cotransporters	2	AT1G32450	+	+
		2	AT1G32530	+	+
	basic Helix-Loop-Helix (bHLH) Transcription Factor,bHLH Transcription Factor Family	2	AT1G32640	+	+
		2	AT1G32650	+	+
		2	AT1G32690	+	+
		2	AT1G32700	+	+
		2	AT1G32730	+	+
		2	AT1G32740	+	+
		2	AT1G32780	+	+
CTC-interacting domain 11		2	AT1G32790	+	+
	Glycoside Hydrolase Gene Families	2	AT1G32860	+	+
granule bound starch synthase 1	Glycosyltransferase Gene Families	2	AT1G32900	+	+
		2	AT1G32920	+	+
		2	AT1G33055	+
		2	AT1G33110		+
		2	AT1G33230	+	+
GT-2-like 1	Trihelix Transcription Factor Family	2	AT1G33240	+	+
	Glycosyltransferase Gene Families	2	AT1G33250	+	+
	Receptor kinase-like protein family	2	AT1G33260	+	+
		2	AT1G33265	+	+
		2	AT1G33415	+	+
ACTIVATED DISEASE RESISTANCE 1		2	AT1G33560	+
		2	AT1G33600	+	+
		2	AT1G33700	+
		2	AT1G33780	+	+
		2	AT1G33810	+	+
		2	AT1G33811	+	+
one-helix protein 2		2	AT1G34000	+	+
		2	AT1G34110	+	+
inositol polyphosphate 5-phosphatase I		2	AT1G34120	+	+
EPIDERMAL PATTERNING FACTOR 2		2	AT1G34245	+	+
FORMS APLOID AND BINUCLEATE CELLS 1A	Acyl Lipid Metabolism Family	2	AT1G34260	+	+
		2	AT1G34315		+
		2	AT1G34360	+	+
sensitive to proton rhizotoxicity 1	C2H2 Transcription Factor Family	2	AT1G34370	+	+
		2	AT1G34418	+	+
		2	AT1G34420	+	+
embryo defective 3003	Acyl Lipid Metabolism Family	2	AT1G34430	+	+
	Monosaccharide transporter-like gene family,Organic Solute Cotransporters	2	AT1G34580	+	+
PHOSPHATE-INDUCED 1		2	AT1G35140	+	+
		2	AT1G35180	+	+
		2	AT1G35220	+	+
		2	AT1G35340	+	+
		2	AT1G35350	+	+
RALF-like 5		2	AT1G35467	+	+
		2	AT1G35510	+	+
	TCP transcription factor family ï¿½	2	AT1G35560	+
cytosolic invertase 1		2	AT1G35580	+	+
		2	AT1G35610	+	+
		2	AT1G35710	+	+
		2	AT1G35830	+	+
		2	AT1G36070	+	+
acetyl-CoA carboxylase 2	Acyl Lipid Metabolism Family	2	AT1G36180		+
serine hydroxymethyltransferase 7		2	AT1G36370	+	+
	Miscellaneous Membrane Protein Families	2	AT1G42470	+	+
		2	AT1G42480	+	+
glutamate receptor 3.3	Ion Channel Families	2	AT1G42540	+	+
PLASTID MOVEMENT IMPAIRED1		2	AT1G42550	+	+
related to AP2 6	AP2-EREBP Transcription Factor Family	2	AT1G43160	+
		2	AT1G43245		+
VIRE2-interacting protein 1	basic region leucine zipper (bZIP) Transcription Factor,bZIP Transcription Factor Family	2	AT1G43700		+
Cyclin A1;1	Core Cell Cycle Genes	2	AT1G44110	+	+
		2	AT1G44120	+
		2	AT1G44125	+	+
	Miscellaneous Membrane Protein Families	2	AT1G44130	+
aldehyde dehydrogenase 3H1	Aldehyde Dehydrogenase Superfamily	2	AT1G44170	+
CHLORINA 1		2	AT1G44446	+	+
		2	AT1G44790	+	+
		2	AT1G44820	+	+
		2	AT1G45010	+	+
thioredoxin H-type 5		2	AT1G45145	+	+
		2	AT1G45150	+	+
		2	AT1G45231	+	+
		2	AT1G45248	+	+
AGAMOUS-like 97	MADS Transcription Factor Family,MADS-box Transcription Factor Family	2	AT1G46408	+	+
VIER F-box proteine 1	F-Box Proteins	2	AT1G47056	+	+
responsive to dehydration 21A		2	AT1G47128	+	+
WPP domain protein 2		2	AT1G47200	+	+
		2	AT1G47310	+
RNA-binding protein 47C		2	AT1G47490	+	+
		2	AT1G47497	+	+
		2	AT1G47610	+	+
	C2C2-Dof Transcription Factor Family,Dof family	2	AT1G47655	+	+
		2	AT1G47710	+	+
receptor like protein 7	Receptor kinase-like protein family	2	AT1G47890		+
		2	AT1G47900	+	+
	PP2C-type phosphatases	2	AT1G48040	+	+
novel plant snare 12	SNAREs	2	AT1G48240	+	+
CBL-interacting protein kinase 17	CBL-interacting serione-threonine Protein Kinases (AtCIPKs)	2	AT1G48260	+	+
		2	AT1G48280	+	+
diacylglycerol acyltransferase 3		2	AT1G48300		+
DHNA-CoA thioesterase 1		2	AT1G48320	+	+
		2	AT1G48330	+	+
ARGONAUTE 1	Eukaryotic Initiation Factor Gene Family	2	AT1G48410	+	+
		2	AT1G48430	+	+
		2	AT1G48440	+
		2	AT1G48460	+	+
receptor-like kinase 1	Receptor kinase-like protein family	2	AT1G48480	+	+
		2	AT1G48530	+	+
high mobility group A5		2	AT1G48620	+	+
		2	AT1G48745	+	+
		2	AT1G48840	+	+
TRICHOME BIREFRINGENCE-LIKE 7		2	AT1G48880	+	+
nucleolin like 1		2	AT1G48920	+	+
STOMATAL CYTOKINESIS-DEFECTIVE 1		2	AT1G49040	+	+
		2	AT1G49170	+	+
		2	AT1G49470	+	+
related to vernalization1 1	REM Transcription Factor Family	2	AT1G49480	+	+
	Leucine-rich repeat extensin,Trihelix Transcription Factor Family	2	AT1G49490	+	+
embryo defective 1273		2	AT1G49510	+	+
	G2-like Transcription Factor Family	2	AT1G49560	+	+
	CRKs	2	AT1G49580	+	+
		2	AT1G49590	+	+
		2	AT1G49610	+	+
	Core Cell Cycle Genes	2	AT1G49620	+	+
		2	AT1G49670	+	+
fucosyltransferase 12	Family of Arabidopsis genes related to Xyloglucan Fucosyltransferase1,Glycosyltransferase Gene Families	2	AT1G49710	+	+
abscisic acid responsive element-binding factor 1	basic region leucine zipper (bZIP) Transcription Factor,bZIP Transcription Factor Family	2	AT1G49720	+	+
	Receptor kinase-like protein family	2	AT1G49730	+	+
plant U-box 26	Plant U-box protein (PUB)	2	AT1G49780	+	+
		2	AT1G49840	+	+
	C3H Transcription Factor Family	2	AT1G49850	+	+
	C2H2 Transcription Factor Family	2	AT1G49900	+	+
		2	AT1G49990	+	+
		2	AT1G50020	+	+
		2	AT1G50040	+	+
FTSH protease 1	FtsH: AAA ATP-dependent zinc metallopeptidase	2	AT1G50250	+	+
		2	AT1G50270	+	+
TBP-associated factor 15		2	AT1G50300	+	+
scarecrow-like 3	GRAS Gene Family,GRAS Transcription Factor Family	2	AT1G50420	+	+
hexokinase-like 1		2	AT1G50460	+	+
	Pirin-like proteins	2	AT1G50590	+	+
scarecrow-like 5	GRAS Gene Family,GRAS Transcription Factor Family	2	AT1G50600	+	+
ethylene responsive element binding factor 3	AP2-EREBP Transcription Factor Family	2	AT1G50640		+
		2	AT1G50910	+	+
	Non-SMC Element family	2	AT1G51130	+	+
FLOWERING BHLH 3	basic Helix-Loop-Helix (bHLH) Transcription Factor,bHLH Transcription Factor Family	2	AT1G51140	+
UNICORN	AGC Family	2	AT1G51170	+	+
	Glycosyltransferase Gene Families	2	AT1G51210	+	+
		2	AT1G51230	+	+
		2	AT1G51300	+	+
		2	AT1G51310	+	+
		2	AT1G51350	+	+
		2	AT1G51380	+	+
NFU domain protein 5		2	AT1G51390	+	+
ATP-binding cassette G12	ABC Superfamily,ABC transporters	2	AT1G51500	+	+
		2	AT1G51510	+	+
	Lipid Metabolism Gene Families	2	AT1G51570	+	+
		2	AT1G51620		+
		2	AT1G51670	+	+
protein phosphatase 2A 55 kDa regulatory subunit B alpha isoform		2	AT1G51690	+	+
	Receptor kinase-like protein family	2	AT1G51790		+
		2	AT1G51870	+	+
LysM-containing receptor-like kinase 3	Receptor kinase-like protein family	2	AT1G51940	+	+
		2	AT1G52000	+	+
		2	AT1G52155	+	+
	Organic Solute Cotransporters	2	AT1G52190	+	+
proline-rich extensin-like receptor kinase 15		2	AT1G52290	+	+
		2	AT1G52315		+
		2	AT1G52325	+	+
		2	AT1G52342	+	+
beta glucosidase 18	Glycoside Hydrolase Gene Families	2	AT1G52400	+	+
	C2H2 Transcription Factor Family	2	AT1G52430	+	+
FAR1-related sequence 6		2	AT1G52520	+	+
		2	AT1G52565		+
phospholipase D alpha 2	Acyl Lipid Metabolism Family,Phospholipase D,Phospholipase D (Zarsky group)	2	AT1G52570	+	+
RHOMBOID-like protein 5		2	AT1G52580	+	+
		2	AT1G52600	+	+
		2	AT1G52620	+	+
		2	AT1G52780	+	+
		2	AT1G52905	+	+
		2	AT1G52990	+	+
		2	AT1G53060	+	+
SPA1-related 4		2	AT1G53090	+	+
		2	AT1G53163	+	+
ethylene response factor 8	AP2-EREBP Transcription Factor Family	2	AT1G53170	+	+
		2	AT1G53180	+	+
	EF-hand containing proteins	2	AT1G53210	+	+
TEOSINTE BRANCHED 1, cycloidea and PCF transcription factor 3	TCP transcription factor family ï¿½	2	AT1G53230	+	+
tetratricopeptide-repeat thioredoxin-like 1		2	AT1G53300	+	+
		2	AT1G53380	+
ATP-binding cassette G24	ABC Superfamily,ABC transporters,ABC transporters	2	AT1G53390	+
		2	AT1G53400	+	+
		2	AT1G53530	+	+
		2	AT1G53550	+	+
glyoxalase II 3		2	AT1G53580	+	+
		2	AT1G53625	+
		2	AT1G53633	+	+
		2	AT1G53690	+	+
regulatory particle triple-A 1A		2	AT1G53750	+	+
GDSL-motif lipase 5		2	AT1G53920		+
		2	AT1G53935	+	+
GDSL-motif lipase 2		2	AT1G53940	+	+
		2	AT1G54050	+	+
exocyst subunit exo70 family protein D2	EXO70 exocyst subunit family	2	AT1G54090	+	+
		2	AT1G54095	+	+
		2	AT1G54200	+	+
		2	AT1G54215	+	+
		2	AT1G54410	+
		2	AT1G54420	+	+
		2	AT1G54820	+	+
		2	AT1G54860	+	+
		2	AT1G54920	+	+
	EF-hand containing proteins	2	AT1G55040	+	+
beta-fructofuranosidase 5	Glycoside Hydrolase Gene Families	2	AT1G55120	+	+
		2	AT1G55190	+	+
		2	AT1G55200	+	+
		2	AT1G55210	+	+
histone mono-ubiquitination 2		2	AT1G55250	+	+
	Acyl Lipid Metabolism Family	2	AT1G55260	+	+
		2	AT1G55280	+	+
GRAND CENTRAL		2	AT1G55325	+	+
		2	AT1G55365	+	+
		2	AT1G55525	+	+
		2	AT1G55530	+	+
Lateral Suppressor	GRAS Gene Family,GRAS Transcription Factor Family	2	AT1G55580	+	+
		2	AT1G55770	+	+
cellulose synthase like E1	Glycosyltransferase Gene Families,Plant Cell Wall Biosynthesis Families	2	AT1G55850	+	+
ABA-HYPERSENSITIVE GERMINATION 2		2	AT1G55870	+	+
		2	AT1G55880	+	+
serine acetyltransferase 2;1		2	AT1G55920	+	+
		2	AT1G55928	+	+
		2	AT1G55930	+	+
		2	AT1G56020	+	+
		2	AT1G56145	+
		2	AT1G56150		+
		2	AT1G56210	+	+
		2	AT1G56220	+	+
		2	AT1G56230	+	+
		2	AT1G56270	+	+
drought-induced 19		2	AT1G56280	+
		2	AT1G56300	+	+
secretion-associated RAS 1B		2	AT1G56330	+	+
calreticulin 1a		2	AT1G56340	+
		2	AT1G56530	+	+
		2	AT1G56550	+	+
SMALLER WITH VARIABLE BRANCHES		2	AT1G56580	+	+
galactinol synthase 2	Glycosyltransferase Gene Families	2	AT1G56600	+	+
		2	AT1G56660	+
		2	AT1G56670	+	+
		2	AT1G56690	+	+
		2	AT1G56700	+	+
		2	AT1G56720	+	+
	Carbohydrate Esterase Gene Families	2	AT1G57590	+	+
		2	AT1G57600	+
purine permease 18	Organic Solute Cotransporters	2	AT1G57990	+
		2	AT1G58037	+	+
		2	AT1G58060	+	+
		2	AT1G58070	+	+
TCP domain protein 8	TCP transcription factor family ï¿½	2	AT1G58100	+	+
		2	AT1G58170	+	+
		2	AT1G58270	+
		2	AT1G58290	+
		2	AT1G58420	+	+
	Miscellaneous Membrane Protein Families	2	AT1G58440	+
		2	AT1G58460	+	+
RNA-binding protein 1		2	AT1G58470	+	+
		2	AT1G58520	+	+
		2	AT1G59520	+	+
		2	AT1G59600	+	+
BIG PETAL P	basic Helix-Loop-Helix (bHLH) Transcription Factor,bHLH Transcription Factor Family	2	AT1G59640	+	+
		2	AT1G59710	+	+
	Organic Solute Cotransporters	2	AT1G59740	+
aminophospholipid ATPase 3	Acyl Lipid Metabolism Family,Primary Pumps (ATPases) Gene Families	2	AT1G59820	+	+
cofactor assembly of complex C		2	AT1G59840	+	+
		2	AT1G59865	+
response regulator 3	Response Regulator	2	AT1G59940	+	+
		2	AT1G59970	+	+
		2	AT1G60000	+	+
		2	AT1G60010	+	+
		2	AT1G60070	+	+
trehalose phosphate synthase	Glycosyltransferase Gene Families,Trehalose Biosynthesis Gene Families	2	AT1G60140	+	+
	Inorganic Solute Cotransporters	2	AT1G60160	+	+
plant U-box 19	Plant U-box protein (PUB)	2	AT1G60190	+
galactinol synthase 7	Glycosyltransferase Gene Families	2	AT1G60450	+	+
galactinol synthase 4	Glycosyltransferase Gene Families	2	AT1G60470	+	+
RALF-like 6		2	AT1G60625	+	+
	Receptor kinase-like protein family	2	AT1G60630	+	+
		2	AT1G60670	+	+
TRICHOME BIREFRINGENCE-LIKE 2		2	AT1G60790	+	+
NSP-interacting kinase 3	Receptor kinase-like protein family	2	AT1G60800	+	+
ATP-citrate lyase A-2	Acyl Lipid Metabolism Family	2	AT1G60810	+	+
SNF1-related protein kinase 2.10		2	AT1G60940	+	+
vernalization independence 5		2	AT1G61040	+	+
	Glycosyltransferase Gene Families	2	AT1G61050	+	+
bromodomain 4		2	AT1G61215	+	+
secretory carrier 3	Miscellaneous Membrane Protein Families	2	AT1G61250	+	+
		2	AT1G61350	+	+
		2	AT1G61370	+
		2	AT1G61420		+
		2	AT1G61460	+	+
MILDEW RESISTANCE LOCUS O 6	Miscellaneous Membrane Protein Families,MLO proteins	2	AT1G61560		+
		2	AT1G61590	+	+
		2	AT1G61610		+
	basic Helix-Loop-Helix (bHLH) Transcription Factor,bHLH Transcription Factor Family	2	AT1G61660	+
		2	AT1G61740	+	+
		2	AT1G61750	+	+
		2	AT1G61795	+	+
glucose-6-phosphate/phosphate translocator 2	Antiporters	2	AT1G61800	+	+
beta-glucosidase 45	Glycoside Hydrolase Gene Families	2	AT1G61810	+	+
		2	AT1G61880	+	+
		2	AT1G61890	+	+
		2	AT1G61900	+	+
		2	AT1G61960	+	+
		2	AT1G61970		+
microRNA171C		2	AT1G62035	+	+
autophagy 8c		2	AT1G62040	+	+
		2	AT1G62050	+	+
		2	AT1G62190	+	+
peptide transporter 6	Organic Solute Cotransporters	2	AT1G62200	+	+
		2	AT1G62290	+	+
	WRKY Transcription Factor Family,WRKY Transcription Factor Superfamily	2	AT1G62300	+
		2	AT1G62310	+	+
		2	AT1G62330	+	+
	C3H Transcription Factor Family	2	AT1G62370	+	+
ACC oxidase 2		2	AT1G62380	+	+
Phox2		2	AT1G62390	+	+
		2	AT1G62420	+	+
		2	AT1G62421	+	+
leucine-rich repeat/extensin 2	Leucine-rich repeat extensin	2	AT1G62440	+	+
		2	AT1G62500	+	+
flavin-monooxygenase glucosinolate S-oxygenase 4		2	AT1G62570	+	+
		2	AT1G62590	+
beta vacuolar processing enzyme		2	AT1G62710	+	+
		2	AT1G62780	+	+
	Acyl Lipid Metabolism Family	2	AT1G62790	+
aspartate aminotransferase 4		2	AT1G62800	+	+
COPPER AMINE OXIDASE1		2	AT1G62810	+	+
		2	AT1G62870	+	+
		2	AT1G62914	+	+
ACC synthase 10		2	AT1G62960	+	+
KNOTTED-like homeobox of Arabidopsis thaliana 7	Homeobox Transcription Factor Family	2	AT1G62990	+	+
		2	AT1G63010	+	+
		2	AT1G63080	+	+
		2	AT1G63230	+	+
		2	AT1G63240	+
tetraspanin10		2	AT1G63260	+	+
		2	AT1G63300	+	+
		2	AT1G63420	+	+
		2	AT1G63480	+
		2	AT1G63490	+	+
SIGNAL PEPTIDE PEPTIDASE-LIKE 2		2	AT1G63690	+
		2	AT1G63810	+	+
	C3H Transcription Factor Family	2	AT1G63840	+	+
		2	AT1G63850	+	+
		2	AT1G63855	+	+
		2	AT1G63860	+	+
		2	AT1G63870	+	+
		2	AT1G64050	+	+
		2	AT1G64065	+	+
		2	AT1G64130	+	+
		2	AT1G64140	+	+
	Receptor kinase-like protein family	2	AT1G64210	+	+
translocase of outer membrane 7 kDa subunit 2		2	AT1G64220	+	+
ubiquitin-conjugating enzyme 28		2	AT1G64230	+	+
		2	AT1G64255	+	+
		2	AT1G64290	+	+
		2	AT1G64405	+	+
calcineurin B-like protein 8	Calcineurin B-like Calcium Sensor Proteins (AtCBLs),EF-hand containing proteins	2	AT1G64480	+	+
ROTUNDIFOLIA like 22		2	AT1G64585	+	+
		2	AT1G64590	+	+
		2	AT1G64610	+
	C2C2-Dof Transcription Factor Family,Dof family	2	AT1G64620	+	+
with no lysine (K) kinase 10	MAP Kinase Kinase Kinase (MAPKKK) Family	2	AT1G64630	+	+
methionine gamma-lyase		2	AT1G64660	+
		2	AT1G64710	+	+
deletion of SUV3 suppressor 1(I)		2	AT1G64750		+
ILITYHIA		2	AT1G64790	+	+
cytochrome P450, family 89, subfamily A, polypeptide 2	Cytochrome P450	2	AT1G64900	+	+
cytochrome P450, family 89, subfamily A, polypeptide 5	Cytochrome P450	2	AT1G64950	+
		2	AT1G65010	+	+
4-coumarate:CoA ligase 3	Monolignol Biosynthesis	2	AT1G65060	+	+
		2	AT1G65070	+	+
xyloglucan endotransglucosylase/hydrolase 17	Glycoside Hydrolase Gene Families	2	AT1G65310	+	+
		2	AT1G65486	+	+
beta-hexosaminidase 3		2	AT1G65590	+	+
		2	AT1G65690		+
		2	AT1G65720	+
receptor kinase 1		2	AT1G65790		+
receptor kinase 2		2	AT1G65800		+
		2	AT1G65830	+	+
cytosolic NADP+-dependent isocitrate dehydrogenase		2	AT1G65930	+	+
glutamate decarboxylase 2	GAD	2	AT1G65960	+	+
		2	AT1G66000	+	+
		2	AT1G66130	+	+
CYS, MET, PRO, and GLY protein 1	Plant U-box protein (PUB)	2	AT1G66160	+
		2	AT1G66190	+	+
glutamine synthase clone F11		2	AT1G66200	+	+
myb domain protein 20	MYB,MYB Transcription Factor Family	2	AT1G66230	+	+
	Glycoside Hydrolase Gene Families	2	AT1G66250	+	+
		2	AT1G66260	+	+
	Glycoside Hydrolase Gene Families	2	AT1G66280	+	+
RGA-like 1	GRAS Gene Family,GRAS Transcription Factor Family,GRAS Transcription Factor Family	2	AT1G66350	+	+
calmodulin 4	EF-hand containing proteins	2	AT1G66410	+	+
		2	AT1G66460	+	+
ROOT HAIR DEFECTIVE6	basic Helix-Loop-Helix (bHLH) Transcription Factor,bHLH Transcription Factor Family	2	AT1G66470	+	+
ABA overly sensitive mutant 3	WRKY Transcription Factor Family,WRKY Transcription Factor Superfamily	2	AT1G66600	+	+
		2	AT1G66700	+	+
microRNA163		2	AT1G66725	+	+
		2	AT1G66820	+	+
	Receptor kinase-like protein family	2	AT1G66830	+	+
		2	AT1G66880	+
		2	AT1G66890	+	+
	Receptor kinase-like protein family	2	AT1G66910		+
LOB domain-containing protein 40	AS2 family,Lateral Organ Boundaries Gene Family	2	AT1G67100	+	+
		2	AT1G67105	+	+
LITTLE NUCLEI1		2	AT1G67230	+	+
ROTUNDIFOLIA like 21		2	AT1G67265	+	+
	EICBPs	2	AT1G67310	+	+
EMBRYO DEFECTIVE 2813	Core DNA replication machinery	2	AT1G67320	+	+
		2	AT1G67340	+	+
		2	AT1G67360	+
		2	AT1G67390	+	+
		2	AT1G67400	+	+
		2	AT1G67460		+
recovery protein 3		2	AT1G67500	+	+
lipoxygenase 6	Acyl Lipid Metabolism Family	2	AT1G67560	+
		2	AT1G67570	+	+
		2	AT1G67590	+	+
DNA polymerase alpha 2	Core DNA replication machinery	2	AT1G67630	+	+
		2	AT1G67635	+	+
response regulator 11	ARR-B Transcription Factor Family,Response Regulator	2	AT1G67710	+
beta-ketoacyl reductase 1	Acyl Lipid Metabolism Family,Lipid Metabolism Gene Families	2	AT1G67730	+	+
	PP2C-type phosphatases	2	AT1G67820	+	+
		2	AT1G67900	+	+
POLLEN DEFECTIVE IN GUIDANCE 1		2	AT1G67960	+	+
	Glycosyltransferase Gene Families,Trehalose Biosynthesis Gene Families	2	AT1G68020	+
flavin-binding, kelch repeat, f box 1		2	AT1G68050	+	+
IAA-ALANINE RESISTANT 1	Organic Solute Cotransporters	2	AT1G68100	+	+
		2	AT1G68110	+	+
indeterminate(ID)-domain 14	C2H2 Transcription Factor Family	2	AT1G68130	+	+
B-box domain protein 27	C2C2-CO-like Transcription Factor Family	2	AT1G68190	+	+
	C3H Transcription Factor Family	2	AT1G68200	+	+
		2	AT1G68260	+	+
AS1/2 ENHANCER7		2	AT1G68310	+	+
		2	AT1G68330	+	+
		2	AT1G68390	+
	PP2C-type phosphatases	2	AT1G68410	+	+
		2	AT1G68420	+	+
		2	AT1G68470		+
		2	AT1G68490	+	+
		2	AT1G68500	+	+
3-ketoacyl-CoA synthase 6	Acyl Lipid Metabolism Family,Miscellaneous Membrane Protein Families	2	AT1G68530	+	+
cytokinin response factor 10	AP2-EREBP Transcription Factor Family	2	AT1G68550	+	+
	Organic Solute Cotransporters	2	AT1G68570	+	+
	Carbohydrate Esterase Gene Families	2	AT1G68620	+
		2	AT1G68660	+	+
tRNA arginine adenosine deaminase		2	AT1G68720	+	+
phosphoenolpyruvate carboxylase 4		2	AT1G68750	+	+
		2	AT1G68780	+	+
ROTUNDIFOLIA like 15		2	AT1G68825	+	+
PHYLLO		2	AT1G68890	+	+
WPP domain-interacting protein 2		2	AT1G68910	+	+
		2	AT1G68945	+	+
		2	AT1G69130	+	+
		2	AT1G69150	+
	SBP Transcription Factor Family,Superfamily of zinc-coordinating DNA-binding proteins	2	AT1G69170	+	+
	MAP Kinase Kinase Kinase Kinase (MAPKKKK) Family	2	AT1G69220	+	+
SPIRAL1-like2		2	AT1G69230	+	+
		2	AT1G69252	+	+
ABI five binding protein		2	AT1G69260	+
plasmodesmata callose-binding protein 4		2	AT1G69295	+	+
chorismate mutase 3		2	AT1G69370	+	+
		2	AT1G69485	+	+
		2	AT1G69526	+	+
AGAMOUS-like 94	MADS Transcription Factor Family,MADS-box Transcription Factor Family	2	AT1G69540	+	+
		2	AT1G69550	+
	Homeobox Transcription Factor Family	2	AT1G69780	+	+
		2	AT1G69800	+	+
gamma-glutamyl transpeptidase 3		2	AT1G69820	+	+
nitrate transporter 1:2	Organic Solute Cotransporters	2	AT1G69850	+	+
nitrate transporter 1.7	Organic Solute Cotransporters	2	AT1G69870	+	+
		2	AT1G69890	+	+
		2	AT1G69900	+	+
	Receptor kinase-like protein family	2	AT1G69910	+	+
glutathione S-transferase TAU 12	Glutathione S-transferase Family	2	AT1G69920		+
		2	AT1G70000	+	+
		2	AT1G70100	+	+
	Receptor kinase-like protein family	2	AT1G70130		+
formin 8	FH2 proteins	2	AT1G70140	+
		2	AT1G70160	+
		2	AT1G70209	+	+
CYCLIN D1;1	Core Cell Cycle Genes	2	AT1G70210	+	+
		2	AT1G70220	+	+
spermidine synthase 2		2	AT1G70310	+	+
tryptophan aminotransferase of Arabidopsis 1		2	AT1G70560	+	+
ATP-binding cassette B26	ABC Superfamily,ABC transporters	2	AT1G70610	+
microRNA777A		2	AT1G70645	+	+
HOPW1-1-INDUCED GENE1		2	AT1G70690	+	+
	tify family	2	AT1G70700	+	+
glycosyl hydrolase 9B1	Glycoside Hydrolase Gene Families	2	AT1G70710	+	+
phosphoglucomutase 2		2	AT1G70730	+	+
		2	AT1G70740	+	+
		2	AT1G70750	+	+
	C2H2 Transcription Factor Family	2	AT1G70790	+	+
MLP-like protein 43		2	AT1G70890	+	+
		2	AT1G70900	+	+
homeobox-leucine zipper protein 18	Homeobox Transcription Factor Family	2	AT1G70920	+
PIN-FORMED 3	Organic Solute Cotransporters	2	AT1G70940	+	+
		2	AT1G70949	+	+
		2	AT1G71000	+	+
MYB-like 2		2	AT1G71030	+	+
	Glycosyltransferase Gene Families	2	AT1G71070	+	+
		2	AT1G71090	+	+
RADIAL SWELLING 10		2	AT1G71100	+
		2	AT1G71110	+	+
EMS-mutagenized bri1 suppressor 1	Glycosyltransferase Gene Families	2	AT1G71220	+
COP9-signalosome 5B		2	AT1G71230	+	+
		2	AT1G71360	+	+
		2	AT1G71420	+	+
		2	AT1G71430	+	+
PFIFFERLING		2	AT1G71440	+	+
AGAMOUS-like 12	MADS Transcription Factor Family,MADS-box Transcription Factor Family	2	AT1G71692	+	+
		2	AT1G71710	+	+
PIGMENT DEFECTIVE 338		2	AT1G71720	+
Hypoxanthine-guanine phosphoribosyltransferase	Phosphoribosyltransferases (PRT)	2	AT1G71750	+	+
		2	AT1G71760	+	+
		2	AT1G71828	+	+
somatic embryogenesis receptor-like kinase 1	Receptor kinase-like protein family	2	AT1G71830	+	+
sucrose-proton symporter 1	Organic Solute Cotransporters,Sucrose-H+ symporters	2	AT1G71880	+	+
		2	AT1G71900	+	+
vascular related NAC-domain protein 7	NAC Transcription Factor Family	2	AT1G71930	+	+
		2	AT1G71970	+	+
transcription factor IIIA	C2H2 Transcription Factor Family	2	AT1G72050	+	+
		2	AT1G72141	+	+
PATELLIN 1		2	AT1G72150	+	+
	C3H Transcription Factor Family	2	AT1G72175	+	+
	Receptor kinase-like protein family	2	AT1G72180	+	+
	basic Helix-Loop-Helix (bHLH) Transcription Factor,bHLH Transcription Factor Family	2	AT1G72210		+
	Kinesins	2	AT1G72250	+	+
		2	AT1G72270	+	+
endoplasmic reticulum oxidoreductins 1		2	AT1G72280	+
PSY1 receptor		2	AT1G72300		+
		2	AT1G72410	+	+
		2	AT1G72416	+	+
		2	AT1G72420	+	+
embryo sac development arrest 25		2	AT1G72440	+	+
jasmonate-zim-domain protein 6	tify family	2	AT1G72450	+	+
exocyst subunit exo70 family protein D1	EXO70 exocyst subunit family	2	AT1G72470	+	+
		2	AT1G72480	+	+
		2	AT1G72620	+	+
	Acyl Lipid Metabolism Family,Primary Pumps (ATPases) Gene Families	2	AT1G72700	+	+
HYPERSENSITIVE TO ABA1	PP2C-type phosphatases	2	AT1G72770	+
		2	AT1G72780	+	+
	Chloroplast and Mitochondria gene families	2	AT1G72820	+	+
		2	AT1G72940	+	+
PYR1-like 3		2	AT1G73000	+	+
phosphate starvation-induced gene 2		2	AT1G73010		+
Low PSII Accumulation 3		2	AT1G73060	+	+
		2	AT1G73066	+
CLAVATA3/ESR-RELATED 1		2	AT1G73165	+	+
kunitz trypsin inhibitor 1		2	AT1G73260	+	+
		2	AT1G73340		+
		2	AT1G73400	+	+
		2	AT1G73470	+	+
	Acyl Lipid Metabolism Family	2	AT1G73480	+
		2	AT1G73490	+	+
	Acyl Lipid Metabolism Family	2	AT1G73600	+	+
		2	AT1G73655	+	+
alpha dioxygenase	Acyl Lipid Metabolism Family	2	AT1G73680	+	+
		2	AT1G73750	+	+
		2	AT1G73770	+	+
BR enhanced expression 3	basic Helix-Loop-Helix (bHLH) Transcription Factor,bHLH Transcription Factor Family	2	AT1G73830	+	+
actin-related proteins 4A		2	AT1G73910	+	+
	C3H Transcription Factor Family	2	AT1G73950	+	+
		2	AT1G73970	+	+
strictosidine synthase 3		2	AT1G74000	+	+
enolase 1		2	AT1G74030	+
myb domain protein 122	MYB,MYB Transcription Factor Family	2	AT1G74080	+	+
sulfotransferase 16		2	AT1G74100	+	+
		2	AT1G74120	+	+
TON1 Recruiting Motif 4		2	AT1G74160	+	+
receptor like protein 15	Miscellaneous Membrane Protein Families	2	AT1G74190	+	+
heat shock protein 101		2	AT1G74310	+
dolichol phosphate mannose synthase 2		2	AT1G74340	+	+
		2	AT1G74460	+	+
		2	AT1G74470	+	+
		2	AT1G74510	+	+
		2	AT1G74630	+	+
		2	AT1G74640	+	+
myb domain protein 31	MYB,MYB Transcription Factor Family	2	AT1G74650	+	+
mini zinc finger 1	ZF-HD Transcription Factor Family,zinc finger-homeobox gene family	2	AT1G74660		+
GA-stimulated Arabidopsis 6		2	AT1G74670	+	+
[truncated: 15,238 more rows]
